# Supplementary material
Source: Research Square preprint supplement (doi:10.21203/rs.3.rs-9404573/v1)
Supplement: Supplementary file 1 [file 2c13a94908756fb1d3aa4266.docx]

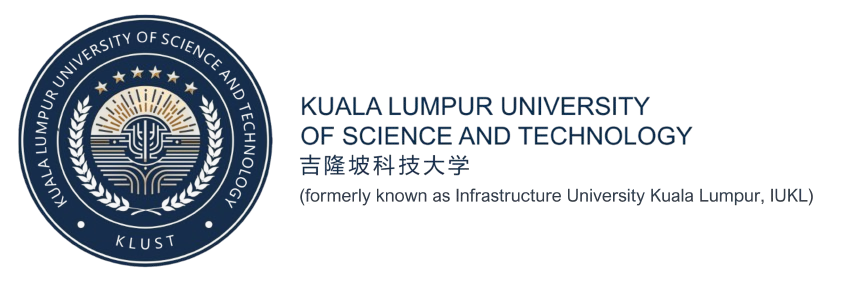
**Questionnaire Validation: Content Validity**

Dear Prof., Assoc. Prof., Dr., Mdm, Ms, Sir,

I am ………….from Department of Arts and Education, Faculty of Business, Information and Human Sciences, Kuala Lumpur University of Science & Technology (KLUST), under the supervision of Dr. Charanjit Kaur Swaran Singh for PhD in Education. I invite you to validate the content of the accompanying questionnaire for my study entitled **“Investigating the Relationship Between Social Media Use, AI Tools, Digital Literacy, and Chinese University Students’ Language Learning Strategies and Motivation.”** This checklist will assist you in judging whether each item aligns with the intended constructs and is suitable for the target population. The study examines the relationships between digital literacy, social media use, and AI tools use in relation to students’ English learning strategies and motivation. **The research objectives are as follows:**

RO1: To examine the relationship between social media use and students’ perceived English language learning strategies.

RO2: To assess how the use of AI-powered learning tools influences students’ motivation for learning English.

RO3: To explore how students’ digital literacy mediates and moderates the influence of social media and AI tools on their learning strategies and motivation.

RO4: To compare learning strategy and motivation differences among students with varying levels of digital literacy.

RO5: To generate practical, evidence-based recommendations for integrating digital tools into English language education based on students’ digital literacy profiles.

**The research questions and hypotheses are:**

RQ1: What is the relationship between students’ use of social media platforms and their perceived English language learning strategies?

H10: There is no relationship between social media usage and the frequency of adaptive English learning strategies among college students.

H11: Social media usage is positively associated with the frequency of adaptive English learning strategies among college students.

RQ2: How does the use of AI-powered learning tools influence students’ motivation for learning English?

H20: There is no association between the use of AI-powered learning tools and students’ self-reported motivation to learn English.

H21: Use of AI-powered learning tools is positively associated with students’ self-reported motivation to learn English.

RQ3: To what extent does digital literacy mediate and moderate the relationships between digital tool usage (social media and AI tools) and students’ learning strategies and motivation?

H30a (Mediation): Digital literacy does not mediate the effect of social media and AI tool usage on learning motivation.

H3a (Mediation): Digital literacy mediates the effect of social media and AI tool usage on learning motivation.

H30b (Moderation): The strength of the relationship between digital tool usage and learning strategies does not depend on students’ level of digital literacy.

H3b (Moderation): The strength of the relationship between digital tool usage and learning strategies depends on students’ level of digital literacy.

RQ4: Are there significant differences in learning strategies and motivation between students with high and low levels of digital literacy?

H40: Students with higher digital literacy do not demonstrate significantly more advanced learning strategies and greater motivation than those with lower digital literacy.

H4: Students with higher digital literacy demonstrate significantly more advanced learning strategies and greater motivation than those with lower digital literacy.

RQ5: What practical recommendations can be derived for integrating digital tools into English language education based on students’ digital literacy levels?

No hypothesis formulated-This question will be explored by analyzing the findings in detail and considering their potential implications.

The target participants are contemporary college students learning English. Data will be collected using a structured self-administered questionnaire. Your expert feedback will inform content validity by focusing on the relevance, clarity and representativeness of each item, and by identifying any items that are essential to the construction of domains.

Thank you very much for your help, cooperation and time.

Sincerely,

**Reviewer Consent Acknowledgement**

I have read the information above and understand the purpose of this content validation. It has been explained how my identity will be kept confidential if I request it. My contribution will be stored safely and securely and will only be accessed by the researcher. I understand that I may withdraw my consent at any time by contacting the researcher.

**Name:** Charanjit Kaur Swaran Singh

**Position:** Associate Professor Dr

**Institution:** Universiti Pendidikan Sultan Idris

**Academic qualification:** PhD (Tesl)

**Signature:**
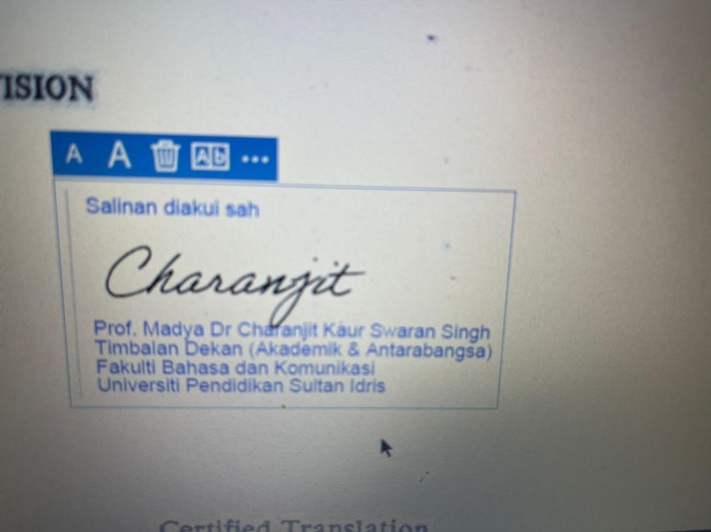


**Date:** 2.10.2026

**Part 1: Demographic Information**

| **Item** | **Expert’s Assessments and Comments** |
| --- | --- |
| 1. Gender:  □ Male  □ Female | | Expert’s Assessments | | | | | | | | Expert’s Comments | | --- | --- | --- | --- | --- | --- | --- | --- | --- | | Degree of Relevance | | | | Degree of Clarity | | | |  | | Not Relevant |  |  | Highly Relevant | Not clear |  |  | Very Clear | | 1 | 2 | 3 | 4 | 1 | 2 | 3 | 4 | |
| 2. Year of Study:  □ Freshman (Year 1)  □ Sophomore (Year 2)  □ Junior (Year 3)  □ Senior (Year 4) | | Expert’s Assessments | | | | | | | | Expert’s Comments | | --- | --- | --- | --- | --- | --- | --- | --- | --- | | Degree of Relevance | | | | Degree of Clarity | | | |  | | Not Relevant |  |  | Highly Relevant | Not clear |  |  | Very Clear | | 1 | 2 | 3 | 4 | 1 | 2 | 3 | 4 | |
| 3. Major:  □ English Major  □ Non-English Major | | Expert’s Assessments | | | | | | | | Expert’s Comments | | --- | --- | --- | --- | --- | --- | --- | --- | --- | | Degree of Relevance | | | | Degree of Clarity | | | |  | | Not Relevant |  |  | Highly Relevant | Not clear |  |  | Very Clear | | 1 | 2 | 3 | 4 | 1 | 2 | 3 | 4 | |
| 4. Self-rated English Proficiency:  □ Beginner  □ Intermediate  □ Advanced | | Expert’s Assessments | | | | | | | | Expert’s Comments | | --- | --- | --- | --- | --- | --- | --- | --- | --- | | Degree of Relevance | | | | Degree of Clarity | | | |  | | Not Relevant |  |  | Highly Relevant | Not clear |  |  | Very Clear | | 1 | 2 | 3 | 4 | 1 | 2 | 3 | 4 | |
| 5.Have you received any formal training on using digital or AI tools for learning?  □ Yes □ No | | Expert’s Assessments | | | | | | | | Expert’s Comments | | --- | --- | --- | --- | --- | --- | --- | --- | --- | | Degree of Relevance | | | | Degree of Clarity | | | |  | | Not Relevant |  |  | Highly Relevant | Not clear |  |  | Very Clear | | 1 | 2 | 3 | 4 | 1 | 2 | 3 | 4 | |

**Part 2: Digital Literacy Scale**

For experts’ information:

In this study, digital literacy is defined as students’ ability to effectively locate, evaluate, create, and communicate information using digital technologies for English language learning (Eshet-Alkalai, 2004). It encompasses technical, cognitive, and socio-emotional skills required to navigate online platforms, critically assess the reliability of learning materials, and integrate digital tools into language learning routines. Digital literacy plays a critical moderating role in students’ utilization of social media and AI tools, particularly in shaping their performance expectancy and perceived effort when using educational technologies.

The items in this section have been adapted from established digital literacy frameworks (Ng, 2012; Eshet-Alkalai, 2004) and modified to specifically address the English language learning context among contemporary college students.

Scale: 1 = Strongly Disagree, 2 = Disagree, 3 = Neutral, 4 = Agree, 5 = Strongly Agree

| **Questionnaire Item** | **Expert’s Assessments and Comments** |
| --- | --- |
| 1. When learning English, I can smoothly use online platforms (websites/apps) to access English learning materials.   1.□ 2.□ 3.□ 4.□ 5.□ | | Expert’s Assessments | | | | | | | | Expert’s Comments | | --- | --- | --- | --- | --- | --- | --- | --- | --- | | Degree of Relevance | | | | Degree of Clarity | | | |  | | Not Relevant |  |  | Highly Relevant | Not clear |  |  | Very Clear | | 1 | 2 | 3 | 4 | 1 | 2 | 3 | 4 | |
| 1. I can use my phone or computer efficiently (e.g., typing/searching) to complete English learning tasks.   1.□ 2.□ 3.□ 4.□ 5.□ | | Expert’s Assessments | | | | | | | | Expert’s Comments | | --- | --- | --- | --- | --- | --- | --- | --- | --- | | Degree of Relevance | | | | Degree of Clarity | | | |  | | Not Relevant |  |  | Highly Relevant | Not clear |  |  | Very Clear | | 1 | 2 | 3 | 4 | 1 | 2 | 3 | 4 | |
| 1. I can use AI tools (e.g., translation or writing tools) to help me understand English content.   1.□ 2.□ 3.□ 4.□ 5.□ | | Expert’s Assessments | | | | | | | | Expert’s Comments | | --- | --- | --- | --- | --- | --- | --- | --- | --- | | Degree of Relevance | | | | Degree of Clarity | | | |  | | Not Relevant |  |  | Highly Relevant | Not clear |  |  | Very Clear | | 1 | 2 | 3 | 4 | 1 | 2 | 3 | 4 | |
| 1. I use digital tools purposefully to improve specific aspects of my English (e.g., vocabulary, writing, speaking).   1.□ 2.□ 3.□ 4.□ 5.□ | | Expert’s Assessments | | | | | | | | Expert’s Comments | | --- | --- | --- | --- | --- | --- | --- | --- | --- | | Degree of Relevance | | | | Degree of Clarity | | | |  | | Not Relevant |  |  | Highly Relevant | Not clear |  |  | Very Clear | | 1 | 2 | 3 | 4 | 1 | 2 | 3 | 4 | |
| 1. When I face technical problems while using digital tools for English learning, I can usually solve them by myself.   1.□ 2.□ 3.□ 4.□ 5.□ | | Expert’s Assessments | | | | | | | | Expert’s Comments | | --- | --- | --- | --- | --- | --- | --- | --- | --- | | Degree of Relevance | | | | Degree of Clarity | | | |  | | Not Relevant |  |  | Highly Relevant | Not clear |  |  | Very Clear | | 1 | 2 | 3 | 4 | 1 | 2 | 3 | 4 | |
| 1. When using online English learning materials, I check whether the information is reliable before I trust or use it.   1.□ 2.□ 3.□ 4.□ 5.□ | | Expert’s Assessments | | | | | | | | Expert’s Comments | | --- | --- | --- | --- | --- | --- | --- | --- | --- | | Degree of Relevance | | | | Degree of Clarity | | | |  | | Not Relevant |  |  | Highly Relevant | Not clear |  |  | Very Clear | | 1 | 2 | 3 | 4 | 1 | 2 | 3 | 4 | |
| 1. I can adjust how I use digital tools based on my English learning needs(instead of copying one source).   1.□ 2.□ 3.□ 4.□ 5.□ | | Expert’s Assessments | | | | | | | | Expert’s Comments | | --- | --- | --- | --- | --- | --- | --- | --- | --- | | Degree of Relevance | | | | Degree of Clarity | | | |  | | Not Relevant |  |  | Highly Relevant | Not clear |  |  | Very Clear | | 1 | 2 | 3 | 4 | 1 | 2 | 3 | 4 | |
| 1. I can organize my English learning materials using digital tools (e.g., bookmarking, note apps, folders, playlists).   1.□ 2.□ 3.□ 4.□ 5.□ | | Expert’s Assessments | | | | | | | | Expert’s Comments | | --- | --- | --- | --- | --- | --- | --- | --- | --- | | Degree of Relevance | | | | Degree of Clarity | | | |  | | Not Relevant |  |  | Highly Relevant | Not clear |  |  | Very Clear | | 1 | 2 | 3 | 4 | 1 | 2 | 3 | 4 | |
| 1. I can organize my English learning materials using digital tools (e.g., bookmarking, note apps, folders, playlists).   1.□ 2.□ 3.□ 4.□ 5.□ | | Expert’s Assessments | | | | | | | | Expert’s Comments | | --- | --- | --- | --- | --- | --- | --- | --- | --- | | Degree of Relevance | | | | Degree of Clarity | | | |  | | Not Relevant |  |  | Highly Relevant | Not clear |  |  | Very Clear | | 1 | 2 | 3 | 4 | 1 | 2 | 3 | 4 | |
| 1. I pay attention to privacy and do not share others’ personal information without permission.   1.□ 2.□ 3.□ 4.□ 5.□ | | Expert’s Assessments | | | | | | | | Expert’s Comments | | --- | --- | --- | --- | --- | --- | --- | --- | --- | | Degree of Relevance | | | | Degree of Clarity | | | |  | | Not Relevant |  |  | Highly Relevant | Not clear |  |  | Very Clear | | 1 | 2 | 3 | 4 | 1 | 2 | 3 | 4 | |
| 1. I can collaborate with classmates using digital tools (e.g., group chats, shared documents) to complete learning tasks.   1.□ 2.□ 3.□ 4.□ 5.□ | | Expert’s Assessments | | | | | | | | Expert’s Comments | | --- | --- | --- | --- | --- | --- | --- | --- | --- | | Degree of Relevance | | | | Degree of Clarity | | | |  | | Not Relevant |  |  | Highly Relevant | Not clear |  |  | Very Clear | | 1 | 2 | 3 | 4 | 1 | 2 | 3 | 4 | |
| 1. When learning English with digital tools, I can choose tools/resources that match my English level and learning goals.   1.□ 2.□ 3.□ 4.□ 5.□ | | Expert’s Assessments | | | | | | | | Expert’s Comments | | --- | --- | --- | --- | --- | --- | --- | --- | --- | | Degree of Relevance | | | | Degree of Clarity | | | |  | | Not Relevant |  |  | Highly Relevant | Not clear |  |  | Very Clear | | 1 | 2 | 3 | 4 | 1 | 2 | 3 | 4 | |

**Part 3: Social Media Use for English Learning**

For experts’ information:

In this study, social media use refers to the extent to which students engage with social media platforms (e.g., WeChat, Bilibili, Xiaohongshu, Douyin/TikTok) specifically for English language learning purposes. Social media facilitates language practice beyond the classroom, promotes learner autonomy, and can enhance language learning motivation when features align with learners’ expectations and goals. The items in this section have been adapted from recent empirical studies on social media in language education (Li et al., 2025; Shu, 2023; Jie et al., 2024) and refined to capture both engagement behaviors and usage patterns relevant to contemporary college students’ English learning contexts.

Scale: 1 = Never, 2 = Rarely, 3 = Sometimes, 4 = Often, 5 = Always

| **Questionnaire Item** | **Expert’s Assessments and Comments** |
| --- | --- |
| 1. I browse English content on short-video platforms (e.g., Bilibili, Douyin/TikTok/ Xiaohongshu, etc.).   1.□ 2.□ 3.□ 4.□ 5.□ | | Expert’s Assessments | | | | | | | | Expert’s Comments | | --- | --- | --- | --- | --- | --- | --- | --- | --- | | Degree of Relevance | | | | Degree of Clarity | | | |  | | Not Relevant |  |  | Highly Relevant | Not clear |  |  | Very Clear | | 1 | 2 | 3 | 4 | 1 | 2 | 3 | 4 | |
| 1. I use WeChat or other messaging apps to join English learning groups.   1.□ 2.□ 3.□ 4.□ 5.□ | | Expert’s Assessments | | | | | | | | Expert’s Comments | | --- | --- | --- | --- | --- | --- | --- | --- | --- | | Degree of Relevance | | | | Degree of Clarity | | | |  | | Not Relevant |  |  | Highly Relevant | Not clear |  |  | Very Clear | | 1 | 2 | 3 | 4 | 1 | 2 | 3 | 4 | |
| 1. I follow English-language content creators or influencers on social media.   1.□ 2.□ 3.□ 4.□ 5.□ | | Expert’s Assessments | | | | | | | | Expert’s Comments | | --- | --- | --- | --- | --- | --- | --- | --- | --- | | Degree of Relevance | | | | Degree of Clarity | | | |  | | Not Relevant |  |  | Highly Relevant | Not clear |  |  | Very Clear | | 1 | 2 | 3 | 4 | 1 | 2 | 3 | 4 | |
| 1. I use digital tools purposefully to improve specific aspects of my English (e.g., vocabulary, writing, speaking).   1.□ 2.□ 3.□ 4.□ 5.□ | | Expert’s Assessments | | | | | | | | Expert’s Comments | | --- | --- | --- | --- | --- | --- | --- | --- | --- | | Degree of Relevance | | | | Degree of Clarity | | | |  | | Not Relevant |  |  | Highly Relevant | Not clear |  |  | Very Clear | | 1 | 2 | 3 | 4 | 1 | 2 | 3 | 4 | |
| 1. I read English posts, articles, or comments on social media feeds.   1.□ 2.□ 3.□ 4.□ 5.□ | | Expert’s Assessments | | | | | | | | Expert’s Comments | | --- | --- | --- | --- | --- | --- | --- | --- | --- | | Degree of Relevance | | | | Degree of Clarity | | | |  | | Not Relevant |  |  | Highly Relevant | Not clear |  |  | Very Clear | | 1 | 2 | 3 | 4 | 1 | 2 | 3 | 4 | |
| 1. I write comments or posts in English on social media platforms.   1.□ 2.□ 3.□ 4.□ 5.□ | | Expert’s Assessments | | | | | | | | Expert’s Comments | | --- | --- | --- | --- | --- | --- | --- | --- | --- | | Degree of Relevance | | | | Degree of Clarity | | | |  | | Not Relevant |  |  | Highly Relevant | Not clear |  |  | Very Clear | | 1 | 2 | 3 | 4 | 1 | 2 | 3 | 4 | |
| 1. I share English learning materials with my friends via social media.   1.□ 2.□ 3.□ 4.□ 5.□ | | Expert’s Assessments | | | | | | | | Expert’s Comments | | --- | --- | --- | --- | --- | --- | --- | --- | --- | | Degree of Relevance | | | | Degree of Clarity | | | |  | | Not Relevant |  |  | Highly Relevant | Not clear |  |  | Very Clear | | 1 | 2 | 3 | 4 | 1 | 2 | 3 | 4 | |
| 1. I use social media to interact with native English speakers or other learners.   1.□ 2.□ 3.□ 4.□ 5.□ | | Expert’s Assessments | | | | | | | | Expert’s Comments | | --- | --- | --- | --- | --- | --- | --- | --- | --- | | Degree of Relevance | | | | Degree of Clarity | | | |  | | Not Relevant |  |  | Highly Relevant | Not clear |  |  | Very Clear | | 1 | 2 | 3 | 4 | 1 | 2 | 3 | 4 | |
| 1. On average, how much time do you spend on social media specifically for English learning per day?   □ Less than 30 mins  □ 30 mins–1 hour  □ 1–2 hours  □ More than 2 hours | | Expert’s Assessments | | | | | | | | Expert’s Comments | | --- | --- | --- | --- | --- | --- | --- | --- | --- | | Degree of Relevance | | | | Degree of Clarity | | | |  | | Not Relevant |  |  | Highly Relevant | Not clear |  |  | Very Clear | | 1 | 2 | 3 | 4 | 1 | 2 | 3 | 4 | |
| 1. How often do you use social media specifically for English learning?   □ Daily □ 4–6 times per week □ 2–3 times per week □ Once a week □ Less than once a week | | Expert’s Assessments | | | | | | | | Expert’s Comments | | --- | --- | --- | --- | --- | --- | --- | --- | --- | | Degree of Relevance | | | | Degree of Clarity | | | |  | | Not Relevant |  |  | Highly Relevant | Not clear |  |  | Very Clear | | 1 | 2 | 3 | 4 | 1 | 2 | 3 | 4 | |
| 1. Which social media platforms do you use most frequently for English learning? (Check all that apply)   □ WeChat □ Bilibili □ Douyin (TikTok) □ Xiaohongshu □ Weibo □ QQ □ YouTube □ Instagram □ Twitter/X □ Other: ________ | | Expert’s Assessments | | | | | | | | Expert’s Comments | | --- | --- | --- | --- | --- | --- | --- | --- | --- | | Degree of Relevance | | | | Degree of Clarity | | | |  | | Not Relevant |  |  | Highly Relevant | Not clear |  |  | Very Clear | | 1 | 2 | 3 | 4 | 1 | 2 | 3 | 4 | |

**Part 4: AI Tool Usage**

For experts’ information:

In this study, AI tool usage is defined as the extent to which students utilize AI-powered applications (e.g., ChatGPT, Duolingo, Google Translate, DeepL, iFLYTEK, Grammarly) for English learning tasks. It includes frequency and purpose of use (e.g., grammar correction, pronunciation feedback, writing assistance), as well as perceived usefulness and engagement level (Qiao & Zhao, 2023; Wang et al., 2024). The items in this section have been adapted from recent studies on AI-assisted language learning (Deep et al., 2025; Sun, 2025; Rosmayanti, 2025) and customized to reflect both the types of AI tools commonly used by Chinese college students and their perceived pedagogical value.

Scale: 1 = Strongly Disagree, 2 = Disagree, 3 = Neutral, 4 = Agree, 5 = Strongly Agree

| **Questionnaire Item** | **Expert’s Assessments and Comments** |
| --- | --- |
| 1. I frequently use AI translation tools (e.g., Google Translate, DeepL) to understand English texts.   1.□ 2.□ 3.□ 4.□ 5.□ | | Expert’s Assessments | | | | | | | | Expert’s Comments | | --- | --- | --- | --- | --- | --- | --- | --- | --- | | Degree of Relevance | | | | Degree of Clarity | | | |  | | Not Relevant |  |  | Highly Relevant | Not clear |  |  | Very Clear | | 1 | 2 | 3 | 4 | 1 | 2 | 3 | 4 | |
| 1. I use AI writing assistants (e.g., Grammarly, ChatGPT) to correct my grammar and writing.   1.□ 2.□ 3.□ 4.□ 5.□ | | Expert’s Assessments | | | | | | | | Expert’s Comments | | --- | --- | --- | --- | --- | --- | --- | --- | --- | | Degree of Relevance | | | | Degree of Clarity | | | |  | | Not Relevant |  |  | Highly Relevant | Not clear |  |  | Very Clear | | 1 | 2 | 3 | 4 | 1 | 2 | 3 | 4 | |
| 1. I use AI-powered apps (e.g., Duolingo, ELSA Speak) to practice vocabulary or pronunciation. 2. □ 2.□ 3.□ 4.□ 5.□ | | Expert’s Assessments | | | | | | | | Expert’s Comments | | --- | --- | --- | --- | --- | --- | --- | --- | --- | | Degree of Relevance | | | | Degree of Clarity | | | |  | | Not Relevant |  |  | Highly Relevant | Not clear |  |  | Very Clear | | 1 | 2 | 3 | 4 | 1 | 2 | 3 | 4 | |
| 1. I use conversational AI (e.g., ChatGPT, chatbots) to practice English dialogue.   1.□ 2.□ 3.□ 4.□ 5.□ | | Expert’s Assessments | | | | | | | | Expert’s Comments | | --- | --- | --- | --- | --- | --- | --- | --- | --- | | Degree of Relevance | | | | Degree of Clarity | | | |  | | Not Relevant |  |  | Highly Relevant | Not clear |  |  | Very Clear | | 1 | 2 | 3 | 4 | 1 | 2 | 3 | 4 | |
| 1. Using AI tools makes learning English more interesting and engaging.   1.□ 2.□ 3.□ 4.□ 5.□ | | Expert’s Assessments | | | | | | | | Expert’s Comments | | --- | --- | --- | --- | --- | --- | --- | --- | --- | | Degree of Relevance | | | | Degree of Clarity | | | |  | | Not Relevant |  |  | Highly Relevant | Not clear |  |  | Very Clear | | 1 | 2 | 3 | 4 | 1 | 2 | 3 | 4 | |
| 1. AI tools provide immediate feedback that helps me learn from my mistakes.   1.□ 2.□ 3.□ 4.□ 5.□ | | Expert’s Assessments | | | | | | | | Expert’s Comments | | --- | --- | --- | --- | --- | --- | --- | --- | --- | | Degree of Relevance | | | | Degree of Clarity | | | |  | | Not Relevant |  |  | Highly Relevant | Not clear |  |  | Very Clear | | 1 | 2 | 3 | 4 | 1 | 2 | 3 | 4 | |
| 1. I feel more confident using English because I can rely on AI support.   1.□ 2.□ 3.□ 4.□ 5.□ | | Expert’s Assessments | | | | | | | | Expert’s Comments | | --- | --- | --- | --- | --- | --- | --- | --- | --- | | Degree of Relevance | | | | Degree of Clarity | | | |  | | Not Relevant |  |  | Highly Relevant | Not clear |  |  | Very Clear | | 1 | 2 | 3 | 4 | 1 | 2 | 3 | 4 | |
| 1. AI tools allow me to learn English at my own pace.   1.□ 2.□ 3.□ 4.□ 5.□ | | Expert’s Assessments | | | | | | | | Expert’s Comments | | --- | --- | --- | --- | --- | --- | --- | --- | --- | | Degree of Relevance | | | | Degree of Clarity | | | |  | | Not Relevant |  |  | Highly Relevant | Not clear |  |  | Very Clear | | 1 | 2 | 3 | 4 | 1 | 2 | 3 | 4 | |
| 1. Using AI tools motivates me to study English more regularly.   1.□ 2.□ 3.□ 4.□ 5.□ | | Expert’s Assessments | | | | | | | | Expert’s Comments | | --- | --- | --- | --- | --- | --- | --- | --- | --- | | Degree of Relevance | | | | Degree of Clarity | | | |  | | Not Relevant |  |  | Highly Relevant | Not clear |  |  | Very Clear | | 1 | 2 | 3 | 4 | 1 | 2 | 3 | 4 | |
| 1. AI tools help me improve my English skills more effectively than traditional methods alone.   1.□ 2.□ 3.□ 4.□ 5.□ | | Expert’s Assessments | | | | | | | | Expert’s Comments | | --- | --- | --- | --- | --- | --- | --- | --- | --- | | Degree of Relevance | | | | Degree of Clarity | | | |  | | Not Relevant |  |  | Highly Relevant | Not clear |  |  | Very Clear | | 1 | 2 | 3 | 4 | 1 | 2 | 3 | 4 | |

**Part 5: English Learning Strategies**

For experts’ information:

In this study, English learning strategies are defined as the range of cognitive, metacognitive, memory, affective, social, and compensation strategies that students consciously adopt to enhance their English language proficiency (Oxford, 1990; O'Malley & Chamot, 1990). These strategies include both traditional approaches (e.g., summarizing, self-monitoring, peer learning) and technology-mediated techniques (e.g., using digital dictionaries, saving online materials, recording pronunciation). Effective learners actively select and orchestrate these strategies based on task demands, personal goals, and contextual factors, with strategy use correlating positively with L2 proficiency and motivation. The items in this section have been adapted from the Strategy Inventory for Language Learning (SILL) (Oxford, 2017) and enhanced with custom items specifically designed to capture digital tool integration in strategy use (Lee, 2023; Ma & Samat, 2022; Guan et al., 2024).

Scale: 1 = Never true of me, 2 = Usually not true, 3 = Somewhat true, 4 = Usually true, 5 = Always true

| **Questionnaire Item** | **Expert’s Assessments and Comments** |
| --- | --- |
| 1. I use new English words in a sentence so I can remember them.   1.□ 2.□ 3.□ 4.□ 5.□ | | Expert’s Assessments | | | | | | | | Expert’s Comments | | --- | --- | --- | --- | --- | --- | --- | --- | --- | | Degree of Relevance | | | | Degree of Clarity | | | |  | | Not Relevant |  |  | Highly Relevant | Not clear |  |  | Very Clear | | 1 | 2 | 3 | 4 | 1 | 2 | 3 | 4 | |
| 1. I connect the sound of a new English word and an image to help me remember.   1.□ 2.□ 3.□ 4.□ 5.□ | | Expert’s Assessments | | | | | | | | Expert’s Comments | | --- | --- | --- | --- | --- | --- | --- | --- | --- | | Degree of Relevance | | | | Degree of Clarity | | | |  | | Not Relevant |  |  | Highly Relevant | Not clear |  |  | Very Clear | | 1 | 2 | 3 | 4 | 1 | 2 | 3 | 4 | |
| 1. I review English lessons often.   1.□ 2.□ 3.□ 4.□ 5.□ | | Expert’s Assessments | | | | | | | | Expert’s Comments | | --- | --- | --- | --- | --- | --- | --- | --- | --- | | Degree of Relevance | | | | Degree of Clarity | | | |  | | Not Relevant |  |  | Highly Relevant | Not clear |  |  | Very Clear | | 1 | 2 | 3 | 4 | 1 | 2 | 3 | 4 | |
| 1. I say or write new English words several times to practice them.   1.□ 2.□ 3.□ 4.□ 5.□ | | Expert’s Assessments | | | | | | | | Expert’s Comments | | --- | --- | --- | --- | --- | --- | --- | --- | --- | | Degree of Relevance | | | | Degree of Clarity | | | |  | | Not Relevant |  |  | Highly Relevant | Not clear |  |  | Very Clear | | 1 | 2 | 3 | 4 | 1 | 2 | 3 | 4 | |
| 1. I try to talk like native English speakers.   1.□ 2.□ 3.□ 4.□ 5.□ | | Expert’s Assessments | | | | | | | | Expert’s Comments | | --- | --- | --- | --- | --- | --- | --- | --- | --- | | Degree of Relevance | | | | Degree of Clarity | | | |  | | Not Relevant |  |  | Highly Relevant | Not clear |  |  | Very Clear | | 1 | 2 | 3 | 4 | 1 | 2 | 3 | 4 | |
| 1. I watch English language TV shows or movies.   1.□ 2.□ 3.□ 4.□ 5.□ | | Expert’s Assessments | | | | | | | | Expert’s Comments | | --- | --- | --- | --- | --- | --- | --- | --- | --- | | Degree of Relevance | | | | Degree of Clarity | | | |  | | Not Relevant |  |  | Highly Relevant | Not clear |  |  | Very Clear | | 1 | 2 | 3 | 4 | 1 | 2 | 3 | 4 | |
| 1. To understand unfamiliar English words, I make guesses.   1.□ 2.□ 3.□ 4.□ 5.□ | | Expert’s Assessments | | | | | | | | Expert’s Comments | | --- | --- | --- | --- | --- | --- | --- | --- | --- | | Degree of Relevance | | | | Degree of Clarity | | | |  | | Not Relevant |  |  | Highly Relevant | Not clear |  |  | Very Clear | | 1 | 2 | 3 | 4 | 1 | 2 | 3 | 4 | |
| 1. If I can't think of an English word, I use a word or phrase that means the same thing.   1.□ 2.□ 3.□ 4.□ 5.□ | | Expert’s Assessments | | | | | | | | Expert’s Comments | | --- | --- | --- | --- | --- | --- | --- | --- | --- | | Degree of Relevance | | | | Degree of Clarity | | | |  | | Not Relevant |  |  | Highly Relevant | Not clear |  |  | Very Clear | | 1 | 2 | 3 | 4 | 1 | 2 | 3 | 4 | |
| 1. I try to find as many ways as I can to use my English.   1.□ 2.□ 3.□ 4.□ 5.□ | | Expert’s Assessments | | | | | | | | Expert’s Comments | | --- | --- | --- | --- | --- | --- | --- | --- | --- | | Degree of Relevance | | | | Degree of Clarity | | | |  | | Not Relevant |  |  | Highly Relevant | Not clear |  |  | Very Clear | | 1 | 2 | 3 | 4 | 1 | 2 | 3 | 4 | |
| 1. I notice my English mistakes and use that information to help me do better.   1.□ 2.□ 3.□ 4.□ 5.□ | | Expert’s Assessments | | | | | | | | Expert’s Comments | | --- | --- | --- | --- | --- | --- | --- | --- | --- | | Degree of Relevance | | | | Degree of Clarity | | | |  | | Not Relevant |  |  | Highly Relevant | Not clear |  |  | Very Clear | | 1 | 2 | 3 | 4 | 1 | 2 | 3 | 4 | |
| 1. I have clear goals for improving my English skills.   1.□ 2.□ 3.□ 4.□ 5.□ | | Expert’s Assessments | | | | | | | | Expert’s Comments | | --- | --- | --- | --- | --- | --- | --- | --- | --- | | Degree of Relevance | | | | Degree of Clarity | | | |  | | Not Relevant |  |  | Highly Relevant | Not clear |  |  | Very Clear | | 1 | 2 | 3 | 4 | 1 | 2 | 3 | 4 | |
| 1. I encourage myself to speak English even when I am afraid of making a mistake.   1.□ 2.□ 3.□ 4.□ 5.□ | | Expert’s Assessments | | | | | | | | Expert’s Comments | | --- | --- | --- | --- | --- | --- | --- | --- | --- | | Degree of Relevance | | | | Degree of Clarity | | | |  | | Not Relevant |  |  | Highly Relevant | Not clear |  |  | Very Clear | | 1 | 2 | 3 | 4 | 1 | 2 | 3 | 4 | |
| 1. I try to relax whenever I feel afraid of using English.   1.□ 2.□ 3.□ 4.□ 5.□ | | Expert’s Assessments | | | | | | | | Expert’s Comments | | --- | --- | --- | --- | --- | --- | --- | --- | --- | | Degree of Relevance | | | | Degree of Clarity | | | |  | | Not Relevant |  |  | Highly Relevant | Not clear |  |  | Very Clear | | 1 | 2 | 3 | 4 | 1 | 2 | 3 | 4 | |
| 1. I ask English speakers to correct me when I talk.   1.□ 2.□ 3.□ 4.□ 5.□ | | Expert’s Assessments | | | | | | | | Expert’s Comments | | --- | --- | --- | --- | --- | --- | --- | --- | --- | | Degree of Relevance | | | | Degree of Clarity | | | |  | | Not Relevant |  |  | Highly Relevant | Not clear |  |  | Very Clear | | 1 | 2 | 3 | 4 | 1 | 2 | 3 | 4 | |
| 1. I practice English with other students.   1.□ 2.□ 3.□ 4.□ 5.□ | | Expert’s Assessments | | | | | | | | Expert’s Comments | | --- | --- | --- | --- | --- | --- | --- | --- | --- | | Degree of Relevance | | | | Degree of Clarity | | | |  | | Not Relevant |  |  | Highly Relevant | Not clear |  |  | Very Clear | | 1 | 2 | 3 | 4 | 1 | 2 | 3 | 4 | |
| 1. I use digital tools (e.g., online dictionaries, apps) to quickly look up words I don't know.   1.□ 2.□ 3.□ 4.□ 5.□ | | Expert’s Assessments | | | | | | | | Expert’s Comments | | --- | --- | --- | --- | --- | --- | --- | --- | --- | | Degree of Relevance | | | | Degree of Clarity | | | |  | | Not Relevant |  |  | Highly Relevant | Not clear |  |  | Very Clear | | 1 | 2 | 3 | 4 | 1 | 2 | 3 | 4 | |
| 1. I save useful English learning materials I find on social media for later review.   1.□ 2.□ 3.□ 4.□ 5.□ | | Expert’s Assessments | | | | | | | | Expert’s Comments | | --- | --- | --- | --- | --- | --- | --- | --- | --- | | Degree of Relevance | | | | Degree of Clarity | | | |  | | Not Relevant |  |  | Highly Relevant | Not clear |  |  | Very Clear | | 1 | 2 | 3 | 4 | 1 | 2 | 3 | 4 | |
| 1. I use online translation tools to help me understand complex English texts.   1.□ 2.□ 3.□ 4.□ 5.□ | | Expert’s Assessments | | | | | | | | Expert’s Comments | | --- | --- | --- | --- | --- | --- | --- | --- | --- | | Degree of Relevance | | | | Degree of Clarity | | | |  | | Not Relevant |  |  | Highly Relevant | Not clear |  |  | Very Clear | | 1 | 2 | 3 | 4 | 1 | 2 | 3 | 4 | |
| 1. I record myself on my phone/computer to check my English pronunciation   1.□ 2.□ 3.□ 4.□ 5.□ | | Expert’s Assessments | | | | | | | | Expert’s Comments | | --- | --- | --- | --- | --- | --- | --- | --- | --- | | Degree of Relevance | | | | Degree of Clarity | | | |  | | Not Relevant |  |  | Highly Relevant | Not clear |  |  | Very Clear | | 1 | 2 | 3 | 4 | 1 | 2 | 3 | 4 | |

**Part 6: English Learning Motivation**

For experts’ information:

In this study, English learning motivation is defined as the psychological drivers that initiate, direct, and sustain students’ goal-oriented behavior toward acquiring and using English, encompassing both intrinsic (e.g., interest, enjoyment) and extrinsic (e.g., exam results, career goals) factors (Deci & Ryan, 2000; Dörnyei, 2005). The study employs the L2 Motivational Self System framework (Dörnyei, 2009), which conceptualizes motivation through three components: (1) Ideal L2 Self (learners’ vision of themselves as proficient English users), (2) Ought-to L2 Self (external obligations and expectations), and (3) L2 Learning Experience (situational factors in the immediate learning environment, including technology-mediated experiences).

The items in this section have been adapted from validated motivation scales based on Self-Determination Theory (SDT) and the L2 Motivational Self System (Kang et al., 2025; Alamer, 2021; Taguchi et al., 2022) and culturally contextualized for Chinese college students’ motivational profiles. Additional items have been developed to capture the role of digital tools (social media and AI) in shaping students’ motivational orientations.

Scale: 1 = Strongly Disagree, 2 = Disagree, 3 = Slightly Disagree, 4 = Slightly Agree, 5 = Agree, 6 = Strongly Agree

| **Questionnaire Item** | **Expert’s Assessments and Comments** |
| --- | --- |
| 1. I can imagine myself speaking English fluently with international friends.   1.□ 2.□ 3.□ 4.□ 5.□ 6.□ | | Expert’s Assessments | | | | | | | | Expert’s Comments | | --- | --- | --- | --- | --- | --- | --- | --- | --- | | Degree of Relevance | | | | Degree of Clarity | | | |  | | Not Relevant |  |  | Highly Relevant | Not clear |  |  | Very Clear | | 1 | 2 | 3 | 4 | 1 | 2 | 3 | 4 | |
| 1. I imagine myself using English effectively in my future career.   1.□ 2.□ 3.□ 4.□ 5.□ 6.□ | | Expert’s Assessments | | | | | | | | Expert’s Comments | | --- | --- | --- | --- | --- | --- | --- | --- | --- | | Degree of Relevance | | | | Degree of Clarity | | | |  | | Not Relevant |  |  | Highly Relevant | Not clear |  |  | Very Clear | | 1 | 2 | 3 | 4 | 1 | 2 | 3 | 4 | |
| 1. I can imagine myself living or studying abroad and using English.   1.□ 2.□ 3.□ 4.□ 5.□ 6.□ | | Expert’s Assessments | | | | | | | | Expert’s Comments | | --- | --- | --- | --- | --- | --- | --- | --- | --- | | Degree of Relevance | | | | Degree of Clarity | | | |  | | Not Relevant |  |  | Highly Relevant | Not clear |  |  | Very Clear | | 1 | 2 | 3 | 4 | 1 | 2 | 3 | 4 | |
| 1. Using AI tools helps me imagine myself becoming more proficient in English.   1.□ 2.□ 3.□ 4.□ 5.□ 6.□ | | Expert’s Assessments | | | | | | | | Expert’s Comments | | --- | --- | --- | --- | --- | --- | --- | --- | --- | | Degree of Relevance | | | | Degree of Clarity | | | |  | | Not Relevant |  |  | Highly Relevant | Not clear |  |  | Very Clear | | 1 | 2 | 3 | 4 | 1 | 2 | 3 | 4 | |
| 1. Digital learning tools make my future use of English feel more achievable.   1.□ 2.□ 3.□ 4.□ 5.□ 6.□ | | Expert’s Assessments | | | | | | | | Expert’s Comments | | --- | --- | --- | --- | --- | --- | --- | --- | --- | | Degree of Relevance | | | | Degree of Clarity | | | |  | | Not Relevant |  |  | Highly Relevant | Not clear |  |  | Very Clear | | 1 | 2 | 3 | 4 | 1 | 2 | 3 | 4 | |
| 1. I study English because my parents or teachers expect me to.   1.□ 2.□ 3.□ 4.□ 5.□ 6.□ | | Expert’s Assessments | | | | | | | | Expert’s Comments | | --- | --- | --- | --- | --- | --- | --- | --- | --- | | Degree of Relevance | | | | Degree of Clarity | | | |  | | Not Relevant |  |  | Highly Relevant | Not clear |  |  | Very Clear | | 1 | 2 | 3 | 4 | 1 | 2 | 3 | 4 | |
| 1. Learning English is necessary because people surrounding me think I should do it.   1.□ 2.□ 3.□ 4.□ 5.□ 6.□ | | Expert’s Assessments | | | | | | | | Expert’s Comments | | --- | --- | --- | --- | --- | --- | --- | --- | --- | | Degree of Relevance | | | | Degree of Clarity | | | |  | | Not Relevant |  |  | Highly Relevant | Not clear |  |  | Very Clear | | 1 | 2 | 3 | 4 | 1 | 2 | 3 | 4 | |
| 1. I study English primarily to pass exams and get my degree.   1.□ 2.□ 3.□ 4.□ 5.□ 6.□ | | Expert’s Assessments | | | | | | | | Expert’s Comments | | --- | --- | --- | --- | --- | --- | --- | --- | --- | | Degree of Relevance | | | | Degree of Clarity | | | |  | | Not Relevant |  |  | Highly Relevant | Not clear |  |  | Very Clear | | 1 | 2 | 3 | 4 | 1 | 2 | 3 | 4 | |
| 1. I feel expected to use digital or AI tools to improve my English learning performance.   1.□ 2.□ 3.□ 4.□ 5.□ 6.□ | | Expert’s Assessments | | | | | | | | Expert’s Comments | | --- | --- | --- | --- | --- | --- | --- | --- | --- | | Degree of Relevance | | | | Degree of Clarity | | | |  | | Not Relevant |  |  | Highly Relevant | Not clear |  |  | Very Clear | | 1 | 2 | 3 | 4 | 1 | 2 | 3 | 4 | |
| 1. I find learning English interesting and enjoyable.   1.□ 2.□ 3.□ 4.□ 5.□ 6.□ | | Expert’s Assessments | | | | | | | | Expert’s Comments | | --- | --- | --- | --- | --- | --- | --- | --- | --- | | Degree of Relevance | | | | Degree of Clarity | | | |  | | Not Relevant |  |  | Highly Relevant | Not clear |  |  | Very Clear | | 1 | 2 | 3 | 4 | 1 | 2 | 3 | 4 | |
| 1. I really enjoy the atmosphere of my English classes.   1.□ 2.□ 3.□ 4.□ 5.□ 6.□ | | Expert’s Assessments | | | | | | | | Expert’s Comments | | --- | --- | --- | --- | --- | --- | --- | --- | --- | | Degree of Relevance | | | | Degree of Clarity | | | |  | | Not Relevant |  |  | Highly Relevant | Not clear |  |  | Very Clear | | 1 | 2 | 3 | 4 | 1 | 2 | 3 | 4 | |
| 1. I am always eager to learn more English.   1.□ 2.□ 3.□ 4.□ 5.□ 6.□ | | Expert’s Assessments | | | | | | | | Expert’s Comments | | --- | --- | --- | --- | --- | --- | --- | --- | --- | | Degree of Relevance | | | | Degree of Clarity | | | |  | | Not Relevant |  |  | Highly Relevant | Not clear |  |  | Very Clear | | 1 | 2 | 3 | 4 | 1 | 2 | 3 | 4 | |
| 1. Learning English with AI tools makes the learning process more enjoyable.   1.□ 2.□ 3.□ 4.□ 5.□ 6.□ | | Expert’s Assessments | | | | | | | | Expert’s Comments | | --- | --- | --- | --- | --- | --- | --- | --- | --- | | Degree of Relevance | | | | Degree of Clarity | | | |  | | Not Relevant |  |  | Highly Relevant | Not clear |  |  | Very Clear | | 1 | 2 | 3 | 4 | 1 | 2 | 3 | 4 | |
| 1. Immediate feedback from AI tools increases my motivation to learn English.   1.□ 2.□ 3.□ 4.□ 5.□ 6.□ | | Expert’s Assessments | | | | | | | | Expert’s Comments | | --- | --- | --- | --- | --- | --- | --- | --- | --- | | Degree of Relevance | | | | Degree of Clarity | | | |  | | Not Relevant |  |  | Highly Relevant | Not clear |  |  | Very Clear | | 1 | 2 | 3 | 4 | 1 | 2 | 3 | 4 | |
| 1. Technology-supported English learning encourages me to study English more regularly.   1.□ 2.□ 3.□ 4.□ 5.□ 6.□ | | Expert’s Assessments | | | | | | | | Expert’s Comments | | --- | --- | --- | --- | --- | --- | --- | --- | --- | | Degree of Relevance | | | | Degree of Clarity | | | |  | | Not Relevant |  |  | Highly Relevant | Not clear |  |  | Very Clear | | 1 | 2 | 3 | 4 | 1 | 2 | 3 | 4 | |

**Part 7: Data Quality Check**

For experts’ information:

These items are attention check questions designed to ensure that respondents are reading and answering the questionnaire carefully and attentively. Attention checks are standard practices in survey research to identify careless or inattentive responding patterns, which can compromise data quality and validity (Meade & Craig, 2012). Respondents who fail attention checks or report careless responding may be excluded from the final analysis to ensure the reliability and validity of the study findings.

Scale: 1 = Strongly Disagree, 2 = Disagree, 3 = Neutral, 4 = Agree, 5 = Strongly Agree

| **Item** | **Expert’s Assessments and Comments** |
| --- | --- |
| 1. This is a quality-check item. Please select “Agree(4)” for this statement.   1.□ 2.□ 3.□ 4.□ 5.□ | | Expert’s Assessments | | | | | | | | Expert’s Comments | | --- | --- | --- | --- | --- | --- | --- | --- | --- | | Degree of Relevance | | | | Degree of Clarity | | | |  | | Not Relevant |  |  | Highly Relevant | Not clear |  |  | Very Clear | | 1 | 2 | 3 | 4 | 1 | 2 | 3 | 4 | |
| 1. Overall, I answered this questionnaire carefully.   1.□ 2.□ 3.□ 4.□ 5.□ | | Expert’s Assessments | | | | | | | | Expert’s Comments | | --- | --- | --- | --- | --- | --- | --- | --- | --- | | Degree of Relevance | | | | Degree of Clarity | | | |  | | Not Relevant |  |  | Highly Relevant | Not clear |  |  | Very Clear | | 1 | 2 | 3 | 4 | 1 | 2 | 3 | 4 | |
