# Supplementary material
Source: Research Square preprint supplement (doi:10.21203/rs.3.rs-9404573/v1)
Supplement: Supplementary file 1 [file 1716631d8063257e7e0ed349.xlsx]

## Sheet: Sheet1
ID	Gender	Age_Group	Academic_Year	English_Proficiency	SMU1	SMU2	SMU3	SMU4	SMU5	SMU6	SMU7	SMU8	SMU9	SMU10	SMU11	SMU12	SMU13	SMU14	SMU15	AITU1	AITU2	AITU3	AITU4	AITU5	AITU6	AITU7	AITU8	AITU9	AITU10	AITU11	AITU12	AITU13	AITU14	AITU15	AITU16	AITU17	AITU18	AITU19	AITU20	DL1	DL2	DL3	DL4	DL5	DL6	DL7	DL8	DL9	DL10
1	Male	18-19	Year1	Low	2	5	3	3	4	4	3	4	3	4	4	5	4	4	4	3	4	5	4	4	4	5	4	4	2	4	3	3	5	3	3	4	3	3	4	5	5	4	4	4	2	4	4	3	4
2	Female	20-21	Year1	Low	5	4	3	3	3	4	4	4	5	5	4	4	4	4	3	4	4	3	4	4	4	4	4	4	4	4	5	4	3	3	4	4	3	4	5	5	3	3	4	4	3	4	4	3	4
3	Male	20-21	Year1	Low	3	4	3	4	2	4	4	4	4	4	4	3	3	4	4	4	4	3	3	3	4	4	3	4	4	3	4	4	3	3	4	5	5	3	3	5	3	4	3	5	5	5	4	3	4
4	Male	20-21	Year1	Intermediate	3	3	5	3	5	3	4	3	3	5	3	4	4	4	5	4	5	4	3	4	4	4	3	4	2	4	3	4	4	4	3	4	4	4	4	4	5	3	4	4	4	4	4	4	4
5	Male	20-21	Year1	Intermediate	4	4	3	5	4	4	3	4	5	4	3	5	4	4	4	2	5	4	3	3	3	4	3	4	5	3	4	4	4	4	2	4	3	4	4	3	3	5	4	4	4	4	4	4	3
6	Female	22	Year1	High	5	3	5	4	4	4	4	3	4	4	4	4	4	3	4	4	4	4	4	3	3	3	5	4	4	2	4	3	3	3	5	5	4	4	4	4	3	4	4	4	4	4	4	4	4
7	Male	20-21	Year1	High	5	5	4	4	4	4	3	5	4	5	5	5	4	4	3	5	2	3	4	4	4	3	3	4	3	4	3	4	3	4	4	4	4	4	3	3	4	4	3	4	4	4	3	5	4
8	Male	18-19	Year1	Intermediate	4	4	3	3	5	4	4	4	5	4	4	3	4	4	4	4	5	5	5	4	3	3	4	5	5	3	3	4	4	3	3	5	5	4	3	5	4	3	4	4	4	4	4	3	4
9	Male	22	Year1	Intermediate	4	4	3	3	4	4	4	4	4	4	5	4	5	4	5	3	4	3	4	3	3	3	5	4	3	5	3	3	3	4	4	4	3	4	3	4	3	3	3	3	4	5	4	4	2
10	Female	18-19	Year1	Intermediate	4	4	5	4	4	3	4	5	3	5	4	5	4	5	4	3	5	5	2	3	5	4	3	4	3	3	4	2	3	4	4	4	5	4	3	3	3	5	4	4	4	5	4	4	4
11	Male	20-21	Year1	Intermediate	4	4	4	3	4	3	4	3	4	4	4	4	4	4	4	5	5	3	4	3	3	4	3	4	2	3	3	3	4	3	4	3	4	2	4	3	5	5	4	5	4	5	4	3	3
12	Male	18-19	Year1	Intermediate	4	5	4	4	5	4	3	3	4	3	4	4	3	5	3	4	5	3	3	4	5	2	3	4	5	4	3	4	3	5	4	3	5	4	4	3	4	4	4	5	4	4	3	4	5
13	Male	18-19	Year1	Intermediate	4	3	4	3	4	4	4	3	4	5	4	4	4	3	4	4	4	4	3	4	3	4	5	5	4	3	2	4	4	3	3	3	5	4	3	4	4	4	4	4	4	3	4	4	4
14	Male	22	Year1	Intermediate	4	4	4	5	4	3	4	4	3	4	4	4	2	5	2	4	5	4	3	3	4	4	5	4	4	3	3	4	5	4	4	4	4	4	4	4	4	4	4	4	4	4	4	4	4
15	Female	22	Year1	Intermediate	3	3	5	4	3	4	2	4	4	4	5	4	4	4	4	3	5	3	3	4	4	4	4	4	4	4	5	2	4	4	3	4	4	4	4	3	4	4	4	4	4	3	3	4	4
16	Male	20-21	Year1	Intermediate	4	3	5	4	4	4	4	4	3	5	4	4	4	3	3	4	4	3	3	3	5	3	4	4	4	3	4	4	4	4	3	4	4	4	4	4	4	4	5	4	3	4	4	3	4
17	Female	20-21	Year1	Intermediate	3	3	4	5	3	4	4	5	5	3	5	4	3	4	3	4	3	4	4	5	4	3	3	3	4	3	4	4	5	4	4	4	4	3	3	3	3	4	4	4	4	4	4	5	3
18	Female	18-19	Year1	High	4	4	3	3	3	4	5	2	4	3	3	3	3	4	4	4	4	4	3	4	5	3	5	4	4	5	4	3	3	3	5	4	3	4	4	4	4	5	5	4	3	2	4	5	4
19	Female	18-19	Year1	Intermediate	3	4	4	4	3	5	3	4	4	4	4	4	4	4	3	5	4	4	4	3	3	3	4	3	4	4	4	4	5	5	5	3	5	4	4	4	4	4	5	4	4	5	4	4	4
20	Male	18-19	Year1	Low	3	3	4	4	3	4	2	3	4	3	3	3	4	4	4	5	4	4	5	3	4	4	4	4	3	4	4	4	4	4	4	4	4	3	4	4	5	4	4	4	4	4	4	3	5
21	Female	20-21	Year1	High	4	3	3	4	5	4	4	3	3	4	4	4	4	4	5	3	3	4	3	4	4	5	4	3	4	4	4	5	4	4	4	4	3	5	3	3	5	3	4	4	4	4	3	5	5
22	Male	20-21	Year1	Intermediate	5	4	3	5	5	4	4	3	5	4	4	4	4	5	3	4	3	4	4	3	3	3	4	4	4	4	4	2	5	4	3	4	2	5	4	4	4	4	4	4	4	5	3	5	5
23	Female	20-21	Year1	High	4	3	4	4	5	3	3	3	5	4	4	4	4	4	3	4	3	3	2	4	4	4	5	3	4	4	5	5	4	3	5	4	2	4	4	4	5	4	3	5	3	3	3	4	3
24	Female	18-19	Year1	High	3	4	4	4	3	3	3	5	4	3	3	5	5	4	4	4	4	3	4	5	4	4	4	5	3	3	4	3	3	4	5	3	4	3	5	4	2	3	4	4	4	5	3	4	4
25	Female	22	Year1	Intermediate	3	4	4	3	4	4	5	4	5	5	4	4	4	4	5	3	5	4	4	3	3	3	5	3	3	4	3	3	5	5	3	3	3	4	4	4	5	5	3	4	4	4	5	4	4
26	Female	20-21	Year1	Low	4	3	3	3	3	4	4	4	3	4	4	4	3	5	3	5	4	4	4	4	5	5	4	4	4	3	3	3	5	3	4	5	3	4	5	4	4	4	3	3	4	3	3	3	5
27	Female	20-21	Year1	Intermediate	3	4	4	4	3	5	4	5	3	5	3	4	5	3	4	3	4	4	4	5	3	2	3	5	4	4	3	4	5	5	4	5	4	4	4	4	4	3	4	4	3	5	4	4	4
28	Female	20-21	Year1	Intermediate	4	3	3	4	3	3	3	3	4	4	5	3	4	3	4	3	4	4	4	4	5	3	3	4	4	4	5	4	4	3	5	3	3	5	4	3	4	3	4	4	4	4	4	5	4
29	Female	20-21	Year1	Intermediate	4	4	4	3	5	4	3	3	4	3	4	4	3	5	3	4	3	4	5	3	4	4	4	4	3	4	3	5	3	3	3	2	4	3	4	4	4	4	4	3	4	4	4	4	4
30	Female	18-19	Year1	Intermediate	3	5	4	5	4	4	4	2	4	4	3	5	3	4	4	5	3	4	5	4	4	4	3	4	3	4	3	5	4	4	5	4	4	4	3	3	4	4	4	4	4	4	4	3	3
31	Male	20-21	Year1	Low	4	3	3	5	5	4	4	3	4	4	4	4	4	5	4	3	4	3	3	3	3	3	3	5	3	4	4	3	4	5	4	4	4	3	4	3	5	5	5	4	3	4	4	4	3
32	Male	20-21	Year1	High	3	4	3	4	4	4	4	4	4	3	4	3	4	4	4	4	3	4	3	5	3	4	5	4	4	3	4	5	4	2	5	3	3	3	2	4	4	3	4	4	4	3	4	4	4
33	Female	18-19	Year1	High	3	4	3	4	5	5	4	4	3	5	4	3	5	4	5	4	4	4	3	3	3	4	3	4	3	3	4	4	3	4	3	4	3	4	3	4	3	4	5	3	4	4	4	4	5
34	Female	18-19	Year1	Intermediate	4	4	3	4	3	2	4	4	4	3	4	4	4	3	5	4	4	2	3	5	3	4	4	4	5	4	5	3	4	4	4	4	4	4	4	4	5	4	4	4	4	3	2	3	4
35	Female	18-19	Year1	Low	3	4	4	3	5	2	4	3	4	3	4	4	3	4	4	4	4	3	4	5	3	3	4	4	4	5	4	4	3	4	3	4	3	3	5	4	4	3	4	4	3	3	3	3	4
36	Male	18-19	Year1	Intermediate	4	3	3	4	5	4	3	4	4	5	4	5	4	4	4	4	4	3	3	3	3	4	3	3	5	3	4	3	4	4	4	4	5	3	5	4	5	4	5	4	4	4	4	4	3
37	Female	22	Year1	Low	4	4	3	4	3	5	4	4	5	4	4	3	4	5	3	4	2	4	4	4	5	3	5	5	4	4	3	4	3	3	4	3	5	5	4	5	4	4	4	5	4	5	4	4	5
38	Male	20-21	Year1	High	4	3	3	3	4	3	3	4	3	3	4	4	4	5	4	4	3	3	4	4	4	4	3	5	2	3	3	3	4	3	5	4	4	5	4	4	3	4	4	5	4	4	4	3	5
39	Male	20-21	Year1	Low	4	5	4	4	4	2	3	3	4	3	5	4	4	3	4	5	4	4	4	4	4	5	4	3	4	3	4	3	3	4	4	4	5	4	4	3	4	5	4	4	3	4	4	4	4
40	Male	18-19	Year1	Intermediate	5	4	4	4	4	4	4	4	3	5	3	3	4	4	4	4	5	4	3	4	4	2	4	4	3	4	3	4	4	3	4	4	4	2	3	3	3	3	4	3	4	3	4	4	4
41	Male	20-21	Year1	Intermediate	4	5	3	3	3	4	4	3	3	3	4	3	4	4	2	4	3	4	5	5	4	4	4	4	4	5	5	4	4	4	3	5	3	5	4	4	4	4	4	4	4	4	4	3	5
42	Male	20-21	Year1	Intermediate	4	4	4	3	3	3	4	4	3	4	4	3	5	5	5	4	4	3	2	4	5	3	3	4	3	4	4	4	3	3	4	4	4	4	3	4	4	4	4	4	3	4	5	5	3
43	Female	18-19	Year1	Intermediate	4	3	4	4	5	3	3	4	3	4	4	3	4	4	4	4	4	3	4	4	3	5	4	4	5	3	4	5	4	3	4	4	5	4	4	4	3	4	5	4	4	4	5	4	3
44	Female	20-21	Year1	High	4	3	4	5	4	3	3	4	4	4	3	4	4	3	4	4	4	3	4	4	4	3	4	4	5	5	3	4	3	4	4	4	3	3	3	4	3	4	5	4	4	4	4	4	5
45	Female	20-21	Year1	Low	4	3	5	4	4	4	4	3	4	4	3	4	5	4	4	4	4	4	4	4	4	4	3	3	3	4	4	4	4	3	4	4	3	4	4	3	5	3	3	4	4	4	4	4	4
46	Female	20-21	Year1	Low	4	3	5	3	3	3	3	4	4	3	4	3	2	3	5	5	3	4	4	4	3	4	4	3	4	3	3	4	4	4	4	4	3	4	4	4	4	3	4	4	3	4	4	4	3
47	Female	20-21	Year1	Low	3	4	3	4	3	4	3	3	4	3	4	4	5	4	2	5	3	3	4	4	5	3	4	5	4	5	5	4	3	5	4	4	4	4	4	4	4	4	5	5	4	4	4	4	4
48	Male	18-19	Year1	High	3	4	4	3	5	2	4	5	3	4	5	5	3	4	4	3	4	5	4	4	4	3	3	3	4	3	5	4	3	3	4	3	3	3	4	3	5	4	4	4	3	4	4	3	5
49	Female	20-21	Year1	High	3	3	4	5	3	3	5	4	5	3	3	5	3	4	3	4	3	4	4	2	4	5	3	3	4	5	4	2	3	5	4	4	5	4	4	4	4	4	4	3	4	4	3	4	4
50	Female	20-21	Year1	Intermediate	5	4	3	4	4	3	4	5	3	4	5	3	4	5	4	3	4	5	3	4	5	4	5	3	3	3	3	4	5	4	4	4	4	5	5	4	4	4	4	5	4	4	5	4	4
51	Male	20-21	Year1	Intermediate	3	4	4	4	4	4	4	4	4	4	5	4	4	4	4	4	3	3	3	4	4	5	4	4	3	5	4	3	4	3	4	5	4	4	3	4	4	4	4	3	4	5	4	4	3
52	Female	22	Year1	Intermediate	3	4	5	5	4	4	3	4	4	4	4	4	4	3	4	4	4	2	4	5	4	4	3	5	4	4	5	3	5	3	4	5	4	4	5	4	4	4	4	2	4	4	5	4	4
53	Male	20-21	Year1	Low	3	5	3	3	4	4	4	3	4	3	3	4	3	2	4	4	4	4	3	3	4	4	3	4	5	5	4	3	5	4	3	4	3	3	4	4	3	3	4	4	4	4	4	4	3
54	Female	18-19	Year1	High	4	4	3	3	4	3	3	4	5	5	4	4	4	4	3	4	4	4	4	5	3	4	3	5	4	5	3	3	3	5	4	4	3	4	4	3	3	3	3	4	3	4	4	4	3
55	Male	18-19	Year1	Intermediate	4	4	4	3	4	4	4	3	4	4	4	4	3	4	4	2	3	4	4	4	3	4	3	4	3	3	3	3	4	3	4	3	3	4	4	4	3	4	4	4	5	3	5	4	4
56	Female	20-21	Year1	Intermediate	5	3	4	4	4	4	4	4	3	4	4	4	4	3	4	3	4	3	3	4	4	3	3	4	4	5	3	3	3	4	3	4	4	4	3	5	3	3	5	3	4	5	4	4	5
57	Female	18-19	Year1	Intermediate	3	3	4	3	3	5	5	4	5	5	3	3	4	3	4	4	4	4	4	5	4	4	3	3	3	3	3	4	3	4	5	4	4	4	4	5	4	4	4	4	4	4	4	4	4
58	Male	20-21	Year1	Low	4	3	4	2	4	4	3	3	4	5	5	3	4	3	3	2	4	3	3	4	5	3	5	4	4	3	5	4	3	4	2	4	4	4	4	4	4	5	4	4	3	4	3	3	4
59	Male	22	Year1	Low	3	4	4	4	5	4	4	3	4	3	3	4	3	4	4	5	4	4	4	4	4	4	4	3	5	3	2	2	4	3	4	5	3	5	4	4	5	4	4	4	4	3	4	4	5
60	Male	20-21	Year1	Intermediate	5	3	3	4	4	3	4	3	4	4	3	4	4	4	3	4	5	4	4	4	3	4	3	4	4	4	4	4	3	4	4	3	4	4	3	3	3	4	4	5	4	3	4	5	4
61	Male	20-21	Year1	Low	3	4	4	5	3	2	4	4	4	2	5	4	4	4	4	5	3	4	3	3	4	4	4	4	4	4	3	4	4	5	4	3	3	3	5	3	5	5	4	3	3	4	4	4	4
62	Male	20-21	Year1	Intermediate	4	4	5	4	4	4	4	3	4	4	2	4	4	5	4	4	4	4	4	4	5	5	3	4	3	4	3	4	5	4	4	4	4	2	5	4	4	5	4	4	4	5	4	4	5
63	Male	20-21	Year1	Low	4	4	4	4	3	4	3	4	5	4	4	4	3	3	4	2	3	4	4	3	4	4	4	5	4	4	2	4	3	2	4	4	4	4	4	5	4	3	5	5	5	4	4	5	4
64	Male	20-21	Year1	Intermediate	4	3	4	5	4	5	4	4	4	4	5	4	3	4	4	4	4	4	5	4	4	4	4	3	4	4	3	4	4	4	4	4	3	4	4	5	4	4	4	4	5	5	3	4	4
65	Male	22	Year1	Intermediate	4	4	3	3	5	3	4	4	4	3	4	4	4	4	3	5	3	3	4	2	4	5	3	4	4	4	5	4	4	4	3	3	4	3	3	5	3	4	3	5	3	4	4	4	4
66	Female	20-21	Year1	Intermediate	4	4	4	4	3	4	4	4	4	3	3	5	4	4	3	4	4	4	4	4	5	5	5	3	5	5	4	3	4	3	4	4	5	4	4	4	4	4	5	4	4	3	4	4	4
67	Female	22	Year1	Intermediate	4	3	4	4	3	5	4	4	5	4	4	4	4	4	4	3	4	2	3	4	4	5	3	4	4	5	3	4	4	3	4	3	4	4	4	4	4	5	4	4	5	4	3	4	4
68	Male	22	Year1	Intermediate	4	5	4	4	4	4	4	4	3	5	4	4	3	5	5	4	4	3	5	4	3	4	3	4	4	4	4	5	4	4	3	3	4	4	3	3	3	4	4	4	4	3	4	4	3
69	Female	18-19	Year1	Intermediate	4	4	5	4	3	4	4	3	3	3	4	4	3	4	3	3	3	4	3	4	3	4	3	4	2	3	5	5	4	3	4	4	4	3	3	4	4	4	5	4	4	3	4	4	4
70	Female	18-19	Year1	Intermediate	5	4	4	4	3	4	3	3	3	4	4	3	4	3	5	3	3	4	4	3	4	3	4	4	4	4	4	4	3	3	3	3	4	5	4	4	5	4	4	4	3	3	4	4	4
71	Female	18-19	Year1	Intermediate	3	4	4	2	4	3	4	3	3	3	3	4	3	4	5	4	5	4	4	5	3	4	3	3	5	3	5	4	4	4	3	4	3	4	4	4	2	5	3	3	5	3	5	4	4
72	Female	18-19	Year1	High	3	4	3	3	3	5	3	3	4	4	5	4	4	4	4	3	4	4	3	4	4	4	3	3	3	3	4	5	3	3	3	4	4	3	3	4	4	4	4	4	4	5	3	5	4
73	Male	18-19	Year1	Intermediate	4	4	4	4	4	3	4	4	4	4	4	4	3	4	4	3	3	2	4	4	4	4	5	4	2	4	4	5	4	4	3	5	3	4	3	4	3	4	4	5	4	4	4	5	4
74	Female	20-21	Year1	Low	5	4	4	3	4	4	4	4	3	3	4	4	4	3	3	3	4	4	4	3	5	4	4	5	4	4	3	4	3	4	4	4	2	3	5	4	4	3	3	4	4	4	4	4	4
75	Male	18-19	Year1	Low	3	3	4	4	4	3	3	4	3	3	3	4	4	4	4	3	5	3	5	4	5	3	4	3	4	3	4	3	4	3	4	4	4	5	4	4	4	4	4	4	4	4	4	3	4
76	Female	18-19	Year1	Intermediate	5	4	4	4	4	3	4	3	4	4	5	3	4	4	3	4	4	3	3	5	4	5	5	5	4	3	4	4	4	3	5	5	4	4	3	4	4	4	4	3	4	3	3	4	4
77	Female	22	Year1	Intermediate	5	3	4	4	4	5	4	4	4	4	4	4	4	4	4	5	3	4	4	4	2	4	4	4	5	4	4	5	3	4	3	4	3	5	3	4	4	4	3	4	4	2	4	4	3
78	Female	18-19	Year1	Low	3	4	4	4	4	4	3	5	3	3	4	4	4	5	5	4	3	5	2	4	4	4	3	3	4	5	3	3	4	4	4	5	3	4	4	3	5	4	4	3	5	5	4	5	3
79	Male	22	Year1	Intermediate	4	4	4	3	4	5	5	4	4	4	3	4	4	4	3	3	3	4	5	4	4	4	4	3	3	5	4	3	4	4	5	4	4	3	4	4	5	5	4	3	4	4	4	4	5
80	Female	18-19	Year1	Intermediate	5	4	3	4	4	4	3	4	4	4	3	4	4	4	4	4	3	4	3	4	4	4	3	4	3	4	3	3	3	5	4	2	3	4	4	3	3	3	3	4	5	4	4	5	4
81	Male	18-19	Year1	Intermediate	4	4	5	4	4	3	3	3	4	3	4	4	3	4	3	5	3	4	4	3	3	5	5	3	4	5	2	4	4	4	4	5	4	4	5	4	3	5	4	3	4	3	4	4	4
82	Female	20-21	Year1	Intermediate	4	3	5	4	4	4	4	3	5	5	4	4	5	4	4	3	3	3	4	4	3	4	4	3	4	4	4	3	2	4	4	4	5	3	3	4	4	4	4	4	4	3	3	4	5
83	Male	20-21	Year1	Low	3	3	3	3	3	3	4	3	5	3	3	4	4	4	4	3	3	3	4	4	3	4	5	3	3	4	3	4	3	4	3	4	4	3	4	3	5	4	4	4	4	5	4	4	4
84	Female	22	Year1	Low	3	4	4	4	4	4	4	4	4	3	3	4	3	3	4	4	4	4	4	4	2	4	5	3	4	2	4	2	5	4	4	2	3	4	5	3	4	4	4	4	4	5	4	5	4
85	Male	20-21	Year1	Intermediate	3	4	4	4	3	4	5	4	4	3	4	5	4	4	4	5	4	3	5	4	4	5	3	4	4	3	4	4	4	3	4	3	3	3	5	4	5	5	4	3	4	4	3	4	3
86	Male	22	Year1	Intermediate	3	3	4	3	3	3	4	4	4	5	3	5	3	3	4	3	4	4	4	5	3	4	3	4	4	4	4	5	2	4	4	3	4	4	4	3	4	4	4	3	3	3	3	2	4
87	Female	18-19	Year1	Intermediate	4	5	4	5	4	4	2	3	4	4	4	3	4	5	4	3	5	3	4	5	5	4	4	3	3	5	4	3	3	4	3	3	3	4	5	5	4	4	3	3	3	5	4	3	3
88	Male	18-19	Year1	Intermediate	3	3	4	4	4	5	4	5	5	3	4	4	5	4	4	4	5	4	4	3	4	5	3	4	3	3	4	4	3	4	4	5	2	4	4	5	4	4	4	3	4	4	4	4	3
89	Female	20-21	Year1	Low	4	4	3	4	4	4	3	4	3	5	3	3	3	4	4	4	4	4	4	3	5	4	4	4	2	4	4	4	4	4	3	4	4	3	4	4	4	4	3	4	3	4	4	3	4
90	Female	22	Year1	High	3	4	3	5	4	4	4	3	3	4	3	4	4	4	4	4	3	3	3	5	3	5	5	4	4	4	4	4	4	4	5	4	4	3	4	3	4	5	4	3	4	4	3	3	3
91	Female	22	Year1	High	4	3	3	3	4	5	2	4	5	4	4	5	3	4	5	3	3	3	4	5	3	3	4	4	4	4	5	4	4	5	4	4	4	5	3	4	4	4	5	4	5	3	4	4	4
92	Female	20-21	Year1	Intermediate	4	5	3	3	4	4	5	4	4	4	3	4	4	3	4	4	4	3	5	3	4	4	4	4	4	2	4	4	4	3	3	4	4	3	3	3	5	5	4	4	4	3	4	3	3
93	Female	20-21	Year1	Intermediate	3	3	4	4	4	4	4	5	4	3	4	4	3	4	4	4	4	3	4	5	3	5	4	3	4	4	4	5	5	3	3	1	4	4	4	3	4	4	4	3	4	4	4	4	4
94	Female	20-21	Year1	Intermediate	4	4	3	3	3	3	4	3	4	4	4	4	3	4	5	3	3	3	3	4	3	3	4	4	4	4	3	3	4	4	4	3	3	4	4	4	4	4	4	4	5	4	5	3	4
95	Female	18-19	Year1	Intermediate	5	4	4	5	4	4	5	4	4	4	4	3	3	3	4	4	3	5	4	4	4	4	3	4	4	3	4	4	4	3	5	3	4	2	3	4	4	4	4	3	4	3	4	3	3
96	Female	22	Year1	Low	3	3	5	3	4	4	5	5	5	5	5	3	4	3	5	3	3	4	4	5	4	4	2	3	4	4	4	4	5	4	3	4	5	5	3	4	3	4	3	3	5	4	5	3	3
97	Female	22	Year1	High	5	5	3	3	4	3	4	3	4	3	4	3	4	4	4	4	4	5	3	5	5	3	4	3	3	3	4	3	3	3	4	4	3	4	4	4	4	4	4	4	3	4	4	3	4
98	Female	20-21	Year1	Low	4	4	4	4	3	5	4	4	4	5	4	3	4	4	3	4	3	4	5	4	4	3	4	2	3	2	4	2	3	4	3	4	3	3	4	5	4	4	4	4	4	4	4	4	3
99	Female	20-21	Year1	High	3	4	4	3	4	4	4	3	5	4	3	2	3	3	5	3	4	3	4	4	4	4	4	5	4	4	4	4	5	4	4	2	3	4	4	3	4	4	4	4	4	4	5	5	5
100	Male	20-21	Year1	Intermediate	4	4	4	4	5	3	4	4	4	4	5	4	5	5	4	4	3	4	4	4	4	4	3	3	3	4	4	4	4	4	3	4	3	3	4	3	4	4	4	5	5	3	4	4	3
101	Male	18-19	Year1	Low	4	4	4	4	4	4	4	4	4	4	5	5	3	4	4	4	4	4	3	3	4	5	3	5	4	5	4	3	4	4	3	5	4	5	3	4	4	3	5	4	3	5	3	4	4
102	Female	22	Year1	Intermediate	4	4	4	4	3	4	3	4	4	3	4	4	2	4	4	4	3	4	3	4	4	5	4	4	3	4	4	3	3	2	4	5	2	3	4	3	4	4	3	4	5	3	4	4	4
103	Female	20-21	Year1	High	4	4	4	4	4	4	3	5	4	4	4	3	4	4	4	4	4	3	3	3	4	3	4	4	4	4	4	3	3	3	4	4	4	3	5	3	5	5	4	3	5	5	4	3	3
104	Female	22	Year1	Intermediate	3	3	3	4	4	4	3	3	5	2	5	3	3	3	4	4	4	3	4	4	4	4	4	3	4	4	3	3	4	4	3	3	4	3	4	4	4	5	5	3	3	4	4	3	4
105	Female	18-19	Year1	High	4	5	4	3	5	4	4	3	4	3	4	4	4	4	3	4	4	5	4	4	5	4	5	4	4	4	3	4	4	3	3	5	3	4	3	3	4	4	4	4	4	4	5	3	3
106	Female	22	Year1	Intermediate	3	3	4	4	3	4	3	4	4	3	3	3	4	4	5	4	5	4	4	3	5	5	3	4	4	4	4	3	4	3	5	4	3	5	3	4	4	3	4	3	4	4	3	3	5
107	Female	20-21	Year1	Intermediate	4	4	3	5	4	4	4	4	3	3	4	4	4	3	4	3	4	4	4	4	4	4	5	4	4	4	5	4	4	4	4	4	4	5	4	4	4	4	5	5	4	4	4	5	3
108	Female	18-19	Year1	High	3	5	4	4	4	3	4	4	5	4	4	4	5	4	4	4	3	4	4	4	4	4	4	4	2	5	4	3	4	4	3	2	4	3	4	3	4	5	3	3	4	4	3	4	3
109	Female	22	Year1	Low	3	3	4	4	4	3	4	4	4	4	4	3	3	5	3	4	3	4	4	4	4	4	3	4	5	4	4	3	4	5	3	4	4	4	4	3	3	4	4	4	4	4	4	2	3
110	Male	18-19	Year1	Intermediate	5	4	4	4	4	4	4	4	4	4	3	4	3	4	4	4	4	4	5	3	4	4	4	3	5	3	3	4	4	3	4	3	4	4	3	4	4	4	5	3	4	4	4	4	4
111	Female	18-19	Year1	Low	5	3	5	3	4	4	5	5	4	4	3	5	4	4	4	4	5	5	4	4	3	3	4	3	3	4	3	3	5	4	3	4	5	3	4	3	4	4	4	3	4	4	4	3	4
112	Male	22	Year1	High	4	4	5	5	4	4	5	4	3	3	4	5	5	4	4	3	4	4	4	4	4	4	4	4	4	4	3	4	4	4	5	4	4	5	4	4	4	5	5	4	4	3	4	4	4
113	Female	22	Year1	High	3	4	3	4	3	3	3	4	4	4	4	5	3	3	3	5	4	3	4	4	5	5	3	4	3	3	2	3	4	5	4	5	3	5	4	4	4	3	3	4	5	4	4	4	4
114	Female	20-21	Year1	Low	4	4	3	5	4	3	4	4	4	4	4	3	3	5	3	4	4	4	3	4	4	4	4	5	2	3	5	3	3	4	5	4	3	4	3	4	4	4	3	4	4	4	4	4	4
115	Male	20-21	Year1	Intermediate	5	5	4	3	4	3	3	4	5	4	5	5	4	5	4	3	5	3	3	3	4	4	3	4	3	4	2	4	3	3	4	4	4	5	4	4	5	4	4	3	4	3	5	4	4
116	Female	20-21	Year1	High	4	5	4	5	4	4	3	5	3	4	3	4	3	5	5	4	2	5	4	4	3	4	4	3	3	3	4	5	4	4	2	5	4	5	4	4	5	4	4	5	4	4	3	4	4
117	Male	18-19	Year1	Low	5	3	4	4	4	3	3	4	3	4	3	3	4	4	3	4	4	5	4	4	4	2	4	3	4	4	3	2	3	3	5	3	4	4	4	4	4	4	4	4	3	4	5	3	5
118	Female	18-19	Year1	Intermediate	4	4	5	4	4	3	4	4	3	3	4	4	3	3	5	4	4	4	4	4	4	4	3	4	3	4	3	4	4	3	3	4	4	4	3	5	4	4	4	4	5	4	5	4	4
119	Female	20-21	Year1	High	4	3	3	4	5	4	3	4	3	3	4	3	5	3	4	4	3	3	5	4	3	4	3	3	3	5	5	4	3	4	3	4	2	5	5	3	3	4	5	4	4	5	5	5	5
120	Male	20-21	Year1	Low	4	3	4	4	4	4	4	5	5	3	4	4	3	3	4	5	3	3	4	4	4	3	4	4	4	5	4	3	4	4	4	3	3	3	5	4	4	5	5	4	5	5	4	5	4
121	Female	22	Year1	Intermediate	4	4	3	5	3	5	4	5	5	4	3	3	4	4	4	4	3	4	5	4	3	3	3	4	3	3	3	4	4	4	5	4	3	5	2	4	5	4	4	4	4	4	5	4	4
122	Male	20-21	Year1	Intermediate	4	5	5	4	4	3	5	4	4	4	5	4	4	5	3	4	3	4	4	4	4	3	3	4	4	3	3	3	3	4	4	4	3	4	3	4	4	4	3	4	4	4	3	4	3
123	Female	18-19	Year1	High	4	3	5	3	4	5	3	4	5	4	5	5	5	4	4	4	3	4	3	4	4	4	3	4	4	4	3	4	3	4	4	5	3	5	4	3	5	5	3	4	4	4	4	4	4
124	Male	20-21	Year1	High	4	3	3	3	5	4	4	4	4	4	4	4	3	4	3	4	4	3	4	3	3	5	4	4	5	4	4	3	4	4	4	5	4	4	3	3	4	5	4	3	4	4	4	5	4
125	Male	18-19	Year1	High	3	4	3	4	4	3	4	2	4	4	5	4	5	5	3	4	4	3	3	3	3	5	4	2	5	4	4	5	4	4	4	4	5	4	4	3	4	4	4	5	3	4	4	4	4
126	Female	20-21	Year1	Intermediate	3	4	4	4	3	4	4	4	4	4	3	4	4	4	4	4	4	4	5	5	4	3	3	4	4	3	5	3	4	4	4	3	4	4	4	4	4	4	4	5	5	4	4	4	4
127	Female	20-21	Year1	High	3	3	4	4	5	4	3	4	4	4	5	5	4	5	3	4	3	2	4	2	5	4	4	2	3	3	2	4	4	4	4	4	4	3	4	3	4	5	4	4	4	5	2	3	3
128	Male	22	Year1	High	4	4	4	5	4	4	5	4	3	3	4	3	3	5	3	4	3	3	4	4	4	3	5	4	4	3	4	4	4	4	4	3	3	4	4	4	3	4	3	4	4	4	4	4	5
129	Female	20-21	Year1	Intermediate	3	4	4	3	5	5	4	3	4	3	4	4	4	4	4	3	5	3	5	5	3	3	3	3	4	4	4	3	4	4	4	4	4	5	3	4	3	4	4	2	4	5	3	4	4
130	Female	18-19	Year1	High	3	4	3	4	4	4	4	4	4	3	4	4	3	3	4	3	4	5	2	4	4	3	2	2	3	5	4	4	4	4	4	4	4	2	2	5	4	4	5	4	3	3	4	3	3
131	Female	18-19	Year1	Low	4	4	4	3	4	4	3	4	4	4	2	4	5	4	4	3	4	3	4	3	5	4	4	3	4	3	4	3	4	3	2	4	4	3	4	4	5	4	3	4	3	4	4	4	4
132	Male	20-21	Year1	Intermediate	5	4	3	4	4	4	3	4	4	3	3	4	3	4	4	3	4	4	3	4	4	4	4	3	3	3	4	3	3	3	4	2	4	3	4	3	5	3	4	4	4	5	4	4	3
133	Male	20-21	Year1	Low	4	4	4	4	5	3	3	4	4	4	3	3	4	3	5	3	4	4	4	4	4	4	3	5	4	4	4	4	3	4	4	3	2	3	5	3	4	4	3	3	3	3	5	4	4
134	Male	18-19	Year1	Low	4	4	5	4	4	4	4	5	3	4	3	3	3	5	4	4	4	5	4	4	4	4	4	4	4	4	3	3	3	3	4	3	4	5	2	4	4	4	3	4	5	4	5	5	4
135	Male	18-19	Year1	Low	4	4	3	3	4	5	3	4	4	4	4	3	3	5	4	4	4	5	4	3	5	4	4	4	4	3	5	3	4	4	3	5	5	5	4	4	3	5	3	3	4	4	5	4	5
136	Male	20-21	Year1	Intermediate	4	4	4	5	4	3	4	3	4	3	4	3	4	4	3	4	4	4	4	5	4	4	2	5	4	5	4	4	5	4	3	3	3	4	2	3	5	3	4	4	4	4	5	4	4
137	Male	18-19	Year1	Intermediate	4	4	4	4	3	3	3	4	3	4	3	5	4	3	4	2	3	3	5	5	4	5	3	4	4	4	4	3	4	4	4	4	5	3	5	4	4	3	4	4	4	4	4	5	4
138	Male	22	Year1	Intermediate	4	5	4	4	4	4	3	3	4	5	3	4	5	3	4	5	3	3	3	4	4	3	5	4	3	3	5	4	3	4	4	4	4	5	4	4	3	4	5	4	4	4	3	4	4
139	Male	20-21	Year1	Low	4	4	4	4	4	3	4	2	4	3	3	3	3	4	5	4	3	4	4	3	3	4	4	4	5	3	4	4	3	3	4	4	4	3	3	4	3	4	4	5	4	3	3	2	4
140	Male	18-19	Year1	Intermediate	4	4	4	4	4	3	4	5	3	3	5	4	4	4	3	4	4	3	4	3	3	3	4	3	3	4	5	4	4	3	3	4	3	5	4	4	4	4	3	3	5	5	4	4	4
141	Female	18-19	Year1	Intermediate	3	4	4	3	5	4	4	4	3	5	3	3	5	4	4	5	3	4	3	4	4	4	5	5	4	4	4	5	3	3	5	4	3	3	3	3	4	4	4	4	3	4	3	4	4
142	Male	22	Year1	High	4	4	4	4	5	3	3	4	4	4	4	3	4	4	4	3	3	4	3	4	4	4	4	3	4	4	4	4	3	5	4	3	4	4	4	4	4	3	3	3	5	4	4	4	3
143	Female	20-21	Year1	Intermediate	4	5	4	5	3	3	3	4	3	2	4	4	5	4	4	5	3	4	4	3	3	4	4	4	3	3	4	5	5	3	4	3	4	3	4	4	3	4	3	5	3	4	3	4	3
144	Female	20-21	Year1	Intermediate	3	4	3	5	3	4	4	3	4	3	4	3	4	5	4	3	4	5	5	3	4	3	4	3	4	4	4	4	3	4	4	4	4	3	5	4	3	4	4	4	4	3	4	5	4
145	Female	22	Year1	High	4	4	3	3	4	3	4	4	3	4	4	5	3	3	4	4	4	5	4	4	2	3	4	4	3	3	3	3	4	3	4	4	3	5	5	3	3	5	4	4	3	3	4	4	4
146	Male	22	Year1	Intermediate	3	4	3	4	4	3	4	4	4	3	2	4	4	4	3	3	3	4	3	4	3	2	4	5	5	4	5	5	5	5	4	3	4	4	3	4	4	4	4	4	4	3	4	3	3
147	Male	22	Year1	Low	4	3	5	3	4	3	4	3	5	4	4	4	4	4	5	4	3	5	4	3	3	4	4	4	3	3	4	4	3	5	4	3	5	5	4	4	5	4	4	3	4	5	4	4	4
148	Male	20-21	Year1	Low	4	3	5	4	5	4	3	2	3	4	5	4	3	4	4	4	4	4	5	3	3	3	3	4	3	3	4	3	3	3	4	4	5	3	4	3	4	5	4	4	4	4	5	3	5
149	Male	20-21	Year1	High	5	3	3	4	4	4	4	4	4	5	3	4	3	5	3	4	3	5	4	5	5	3	4	4	3	5	4	4	4	3	5	4	4	4	3	4	5	4	4	5	4	4	4	4	4
150	Female	18-19	Year1	Low	4	4	3	3	4	4	3	4	3	4	3	4	4	4	3	4	3	4	4	4	3	5	3	4	3	3	5	5	3	4	3	3	3	4	3	3	4	4	5	4	3	3	5	3	4
151	Male	20-21	Year1	High	4	5	4	3	3	4	4	4	4	5	4	4	4	5	3	4	4	4	4	4	3	3	3	5	5	4	3	4	4	4	3	3	4	4	5	4	3	4	4	3	3	4	4	4	4
152	Male	20-21	Year1	Intermediate	4	5	4	4	3	3	5	4	3	5	3	4	4	4	4	3	4	4	4	4	4	5	4	4	4	3	3	5	4	4	3	3	4	3	4	4	4	5	4	3	4	4	4	4	5
153	Male	20-21	Year1	High	5	4	4	4	4	4	4	4	4	5	4	4	4	4	3	3	3	3	3	4	4	5	3	4	4	2	3	4	4	3	3	5	4	4	4	3	4	4	4	5	4	4	4	4	3
154	Male	22	Year1	High	4	4	4	3	3	4	4	4	3	4	3	4	4	4	4	4	4	3	4	4	3	2	3	3	3	4	4	4	5	5	4	3	4	4	4	4	3	4	4	4	4	4	5	5	4
155	Male	18-19	Year1	High	4	3	4	4	4	4	3	5	4	3	3	4	4	4	4	3	3	4	4	4	4	4	4	3	4	4	4	3	4	4	4	4	3	3	3	4	4	4	5	3	5	4	5	4	3
156	Female	20-21	Year1	Intermediate	3	4	4	4	4	4	4	3	3	4	5	4	4	4	4	4	4	5	4	4	4	3	4	3	3	5	3	4	4	3	4	4	4	2	4	4	5	4	4	3	3	4	5	3	5
157	Male	18-19	Year1	Intermediate	3	3	4	4	5	3	4	4	4	4	3	4	3	5	4	5	4	4	4	4	5	2	4	4	4	4	3	4	2	4	3	5	5	4	4	4	4	5	4	4	4	4	4	4	4
158	Female	20-21	Year1	Intermediate	4	3	2	3	5	5	4	4	3	4	5	4	5	4	3	3	3	4	4	3	4	3	3	3	3	4	4	4	4	3	5	3	4	5	3	4	4	4	4	3	4	4	3	4	5
159	Male	18-19	Year1	Intermediate	3	4	4	4	4	4	5	3	4	5	4	3	3	4	4	5	3	4	3	5	4	4	5	3	3	3	3	4	5	5	4	4	3	3	3	4	4	4	4	4	4	3	4	3	5
160	Female	18-19	Year1	Intermediate	4	4	3	5	4	4	5	3	4	4	3	4	5	5	3	5	4	4	3	3	3	5	4	5	4	5	4	4	2	3	4	3	3	4	4	4	4	5	4	5	4	4	3	4	4
161	Male	18-19	Year1	High	4	3	4	4	4	4	5	3	4	4	4	5	4	2	4	4	5	5	4	3	3	4	4	3	4	4	5	4	4	4	5	2	3	5	4	3	3	4	4	3	4	4	4	4	4
162	Male	20-21	Year1	High	4	4	5	3	5	4	4	3	4	5	4	5	4	3	4	4	3	2	4	4	3	4	4	4	4	3	4	4	4	3	4	4	3	3	4	5	4	4	3	4	3	5	4	4	4
163	Female	20-21	Year1	Intermediate	4	3	4	4	3	5	4	4	3	4	4	3	4	4	4	4	5	3	4	3	5	4	4	4	3	4	4	3	3	3	5	3	4	3	4	4	4	3	3	5	4	3	5	4	4
164	Female	20-21	Year1	Intermediate	4	4	4	4	3	3	5	3	4	2	4	5	3	4	4	4	4	3	4	4	4	5	5	4	3	4	4	5	4	2	3	4	3	3	4	5	4	4	4	4	4	5	4	4	4
165	Female	22	Year1	Intermediate	4	5	4	4	3	3	4	3	5	4	4	4	3	4	3	4	4	3	4	4	4	5	5	4	4	4	4	2	5	4	5	4	5	4	5	4	4	4	5	4	4	4	4	3	3
166	Male	20-21	Year1	Intermediate	3	3	4	4	4	4	4	3	3	5	4	4	3	4	4	3	3	4	3	4	5	3	5	4	3	4	4	5	4	5	3	4	3	5	3	5	3	4	4	4	3	3	4	3	4
167	Female	18-19	Year1	Low	3	2	4	3	4	3	4	5	5	3	5	3	4	4	4	4	3	4	4	4	2	2	4	4	5	4	3	4	4	3	4	3	5	4	4	4	4	5	4	3	3	3	3	5	3
168	Male	22	Year1	Low	4	4	4	5	5	4	4	4	5	4	4	4	4	3	3	4	3	4	4	4	5	2	4	4	2	4	3	4	3	3	3	3	5	3	4	3	4	3	3	4	5	5	4	3	4
169	Male	18-19	Year1	Intermediate	3	5	5	4	3	5	3	4	3	3	3	4	4	4	4	4	3	4	5	4	4	5	5	4	3	4	3	4	4	4	5	4	4	3	4	4	4	4	5	4	3	5	4	4	4
170	Female	22	Year1	Intermediate	4	5	3	4	2	4	4	4	3	5	4	3	4	4	4	4	4	3	3	4	4	4	3	3	3	5	4	4	4	3	3	5	3	3	3	4	4	3	4	5	3	4	3	4	4
171	Female	18-19	Year1	Intermediate	5	3	4	4	4	4	5	5	4	5	5	4	3	5	3	3	3	3	5	3	3	4	4	3	2	4	4	4	3	5	4	3	4	3	4	3	4	3	4	4	5	4	3	4	4
172	Male	22	Year1	Low	5	4	3	4	3	3	2	3	4	3	4	5	3	5	5	3	5	4	4	4	3	3	4	3	3	4	4	4	4	3	3	3	3	4	5	4	4	4	4	4	4	3	4	4	3
173	Male	18-19	Year1	Low	4	4	4	3	3	4	5	5	5	4	5	4	4	4	5	5	3	3	3	3	4	3	4	3	4	3	3	4	5	3	4	3	3	4	4	3	4	4	4	3	4	5	4	4	4
174	Female	22	Year1	Low	5	4	3	5	4	4	5	4	4	3	5	5	5	4	3	4	4	3	4	5	5	4	4	4	4	4	5	4	4	4	3	4	4	4	4	4	4	4	4	4	5	3	4	2	4
175	Female	20-21	Year1	High	4	5	4	4	4	4	4	4	3	4	4	4	5	3	5	4	4	4	3	3	4	4	4	4	5	4	3	3	5	3	5	5	3	4	4	4	3	3	5	4	4	4	3	3	4
176	Female	22	Year1	Intermediate	4	3	4	4	4	3	4	5	3	4	4	4	4	4	4	4	3	5	4	4	5	3	3	5	5	2	3	4	3	3	3	3	3	4	3	3	4	3	4	4	4	5	4	4	4
177	Male	18-19	Year1	Intermediate	3	4	4	4	4	3	4	3	5	4	4	2	4	4	4	3	4	5	4	3	4	3	4	3	4	4	3	4	3	4	3	3	4	4	5	5	3	3	4	3	4	4	4	4	4
178	Male	20-21	Year1	Intermediate	4	4	4	3	4	4	5	4	3	4	3	5	5	4	4	5	3	4	4	3	3	3	3	4	4	3	5	4	4	2	4	5	3	3	4	4	4	4	4	4	4	4	4	3	5
179	Male	22	Year1	Low	4	5	3	4	4	3	4	3	4	5	4	5	4	3	4	3	2	4	3	5	3	5	3	4	4	4	3	4	3	5	3	4	5	4	4	3	4	4	4	4	4	5	4	3	4
180	Male	20-21	Year1	High	4	4	4	4	3	4	3	4	4	3	5	4	4	4	4	3	4	5	4	4	3	4	3	5	2	3	4	3	5	4	4	4	3	3	3	3	3	5	4	4	5	4	4	4	4
181	Male	20-21	Year1	Intermediate	4	4	3	4	3	4	4	5	4	3	3	3	4	4	3	3	3	3	3	3	2	4	4	4	3	4	4	4	5	3	4	3	4	3	4	4	4	4	4	4	4	4	4	2	3
182	Male	20-21	Year1	Low	4	4	3	3	4	4	4	5	4	4	4	4	3	4	3	2	3	5	3	5	3	3	5	3	4	5	4	3	3	3	3	4	4	4	4	4	4	4	4	3	4	4	3	3	4
183	Female	20-21	Year1	Intermediate	4	4	4	4	4	5	4	5	4	3	4	3	3	4	3	3	4	4	4	5	3	2	4	3	4	3	3	5	5	4	4	4	4	3	5	4	5	4	4	4	3	3	5	5	4
184	Male	20-21	Year1	High	5	4	4	3	4	4	3	4	4	3	3	4	4	4	4	3	4	4	5	4	4	3	4	4	4	4	4	4	4	4	5	4	4	4	4	4	4	3	5	4	4	3	4	5	4
185	Male	20-21	Year1	High	4	4	5	4	3	3	5	4	4	3	4	4	4	4	4	4	4	4	4	4	4	3	5	3	3	3	4	3	5	5	4	5	4	4	3	3	4	3	4	4	5	4	4	4	3
186	Male	22	Year1	Intermediate	3	4	4	4	4	4	4	3	4	3	3	3	5	3	4	3	5	5	4	4	4	4	3	3	4	4	4	3	4	3	4	4	4	3	3	5	5	4	4	4	4	4	3	4	3
187	Female	18-19	Year1	Intermediate	2	4	3	3	2	4	3	5	4	3	3	5	4	4	4	4	3	4	4	5	4	5	4	3	5	4	3	4	4	4	5	4	4	4	3	4	4	4	4	4	4	4	3	3	4
188	Male	18-19	Year1	Low	4	4	3	3	4	3	3	4	4	4	3	4	5	4	3	5	4	3	4	3	3	4	4	4	4	4	4	4	5	4	3	4	4	3	3	4	4	3	4	3	4	3	5	3	5
189	Male	22	Year1	High	3	5	4	4	5	3	4	4	3	4	3	4	4	4	3	4	3	5	4	4	2	5	4	5	4	4	3	5	5	4	4	4	4	5	5	4	3	4	4	4	3	4	3	4	4
190	Female	22	Year1	Low	4	4	5	3	3	3	4	5	4	4	5	4	4	4	5	4	5	3	3	3	3	4	3	3	3	4	4	3	4	5	4	4	3	3	5	4	5	4	4	3	3	5	4	4	4
191	Male	20-21	Year1	High	3	3	3	4	3	3	4	3	5	4	3	3	3	4	4	4	3	5	2	3	3	3	3	4	4	2	5	4	4	3	4	3	4	3	4	3	4	4	4	4	4	3	4	4	5
192	Male	20-21	Year1	Intermediate	3	5	3	4	4	4	5	4	3	3	4	4	3	4	4	3	4	4	4	5	4	4	4	4	4	3	4	3	4	4	4	4	4	5	3	4	3	5	5	3	4	4	4	5	4
193	Male	18-19	Year1	Intermediate	4	3	5	2	5	4	4	4	3	4	4	4	4	4	3	4	4	5	5	3	4	5	5	3	4	4	4	3	3	3	3	4	4	4	3	4	4	3	5	4	3	3	3	4	4
194	Male	18-19	Year1	Intermediate	4	3	4	4	4	3	4	4	3	4	5	3	4	4	4	3	4	5	3	4	4	5	4	4	4	2	5	5	4	4	2	3	4	3	4	4	3	4	4	4	4	3	4	4	4
195	Male	20-21	Year1	Low	3	3	3	3	3	4	4	4	4	3	5	5	4	4	4	4	3	4	4	3	4	3	3	3	4	3	4	3	3	4	4	4	4	4	5	3	4	4	4	4	4	4	3	4	3
196	Female	20-21	Year1	Low	2	5	4	3	3	4	3	3	4	2	4	5	4	4	4	5	4	4	3	3	4	4	3	4	3	4	4	4	3	3	4	3	4	4	3	4	4	4	4	5	3	4	4	3	4
197	Female	20-21	Year1	Low	4	3	2	3	4	4	4	4	4	4	4	4	4	4	4	4	2	4	4	4	3	3	3	4	4	3	5	4	4	5	4	3	3	3	4	5	4	4	4	4	3	5	4	3	4
198	Female	18-19	Year1	Low	4	5	4	4	5	4	4	4	3	4	4	5	5	4	4	2	4	2	4	3	3	4	5	4	4	3	4	4	5	3	3	2	4	3	4	5	4	4	4	4	4	4	3	3	4
199	Male	22	Year1	Intermediate	3	4	4	5	4	4	4	4	4	5	3	4	4	5	4	4	4	4	3	4	3	5	3	3	3	4	2	4	4	4	3	5	4	3	5	2	4	4	4	3	3	4	4	4	4
200	Male	22	Year1	Intermediate	4	4	4	4	4	4	4	4	3	4	5	4	5	5	3	4	4	3	4	4	4	4	4	4	4	4	4	3	4	5	4	4	4	4	4	5	3	4	5	3	3	3	4	4	5
201	Male	20-21	Year2	Low	4	4	3	3	4	4	4	3	4	4	3	3	4	4	3	4	2	4	3	5	4	3	5	3	4	3	3	5	5	4	4	4	4	2	4	4	4	3	4	3	5	4	4	4	3
202	Female	20-21	Year2	High	4	4	4	4	4	3	3	4	4	4	4	5	4	4	3	3	3	3	4	5	3	4	3	3	4	3	4	5	3	4	4	3	3	4	4	4	4	3	4	4	4	4	4	4	4
203	Male	18-19	Year2	High	4	4	3	4	3	4	4	3	3	4	4	3	4	4	4	4	3	3	4	3	3	4	5	1	5	3	3	4	2	3	4	2	4	5	3	3	4	4	4	4	4	3	5	3	4
204	Male	22	Year2	High	3	4	4	3	4	5	4	4	3	5	3	4	4	5	4	3	4	5	4	4	3	4	4	5	4	2	3	5	2	3	3	3	4	3	3	3	4	4	4	4	4	4	3	4	4
205	Female	20-21	Year2	High	5	4	3	3	4	3	3	4	5	3	4	3	2	4	4	3	4	4	5	4	4	4	3	4	5	4	4	3	3	4	4	4	5	3	3	4	4	4	3	4	3	4	4	4	4
206	Male	18-19	Year2	Low	4	4	4	3	4	5	4	4	3	4	4	4	4	4	4	4	4	4	4	4	4	4	4	3	4	4	3	4	4	3	4	4	4	3	4	3	4	4	4	4	4	4	4	4	5
207	Female	22	Year2	Intermediate	4	4	3	4	3	4	3	5	5	5	5	4	5	3	4	3	4	4	3	4	4	4	3	3	4	4	4	5	3	3	5	4	4	4	4	3	4	4	4	4	4	3	4	3	3
208	Female	22	Year2	Intermediate	3	4	4	4	5	4	5	4	4	4	4	4	4	3	4	4	3	4	4	4	2	4	4	3	3	3	4	3	4	4	4	4	4	5	3	3	3	4	4	4	3	4	3	4	4
209	Female	22	Year2	Intermediate	4	4	4	4	4	3	4	4	4	5	3	4	4	4	4	3	4	4	4	4	4	3	3	4	4	3	3	3	5	3	5	5	3	5	3	4	4	3	4	4	4	3	4	4	4
210	Male	20-21	Year2	Low	3	5	4	4	3	4	5	3	4	3	4	5	3	4	3	5	4	3	4	4	4	3	2	2	4	4	4	3	3	4	3	4	3	3	4	4	4	5	4	4	3	5	3	4	4
211	Male	20-21	Year2	High	4	4	4	3	4	3	5	4	3	4	4	5	3	3	1	3	4	4	5	5	4	4	4	4	3	4	3	5	4	4	4	4	4	4	5	4	4	3	3	5	4	3	4	4	4
212	Male	20-21	Year2	Low	5	2	3	4	4	4	4	4	4	4	4	4	4	4	4	4	4	4	4	4	3	4	3	5	4	4	4	3	4	4	4	3	3	5	4	4	5	4	5	4	4	3	5	4	4
213	Male	22	Year2	Low	3	4	4	3	3	3	3	4	4	2	4	3	4	4	3	4	5	3	2	4	4	4	4	3	3	4	4	4	3	3	4	3	2	4	3	3	4	4	3	4	4	4	4	4	4
214	Male	22	Year2	Intermediate	3	4	4	4	3	4	3	4	3	3	3	4	5	3	4	3	4	4	3	4	4	3	3	4	4	5	3	3	5	3	3	3	4	4	4	4	5	3	4	3	4	4	5	4	3
215	Male	18-19	Year2	Intermediate	5	4	5	3	3	4	3	3	4	3	4	4	4	5	4	4	3	3	2	4	4	4	3	5	5	3	3	4	4	3	5	3	3	3	5	3	5	4	4	4	4	4	4	4	4
216	Male	18-19	Year2	Intermediate	4	4	3	3	4	4	3	3	4	4	5	4	4	4	5	4	4	4	4	4	4	4	4	4	3	4	4	3	3	4	4	4	4	4	3	4	4	4	4	3	4	3	4	3	4
217	Female	20-21	Year2	Low	3	5	5	3	3	2	5	3	4	4	4	3	4	5	4	4	4	3	2	3	3	4	4	4	5	5	5	3	5	3	3	3	5	5	3	3	3	4	5	4	4	5	3	4	3
218	Male	22	Year2	High	4	4	4	4	3	5	4	4	3	4	4	4	3	4	4	4	3	4	3	5	3	4	4	4	4	4	4	4	4	4	4	3	4	4	3	4	4	4	5	4	4	3	4	3	4
219	Female	22	Year2	Intermediate	3	3	4	4	3	4	4	3	5	4	4	4	2	3	4	4	5	5	3	2	5	4	4	3	3	3	3	3	4	4	4	4	5	3	4	4	5	4	3	4	4	3	5	4	4
220	Male	18-19	Year2	Low	5	4	5	4	4	3	2	4	4	4	4	3	4	4	4	4	4	3	4	4	4	4	3	5	4	3	4	4	5	3	5	4	3	3	4	4	3	4	4	4	3	4	4	4	4
221	Male	20-21	Year2	High	4	3	4	4	4	4	3	5	4	5	4	3	4	4	4	5	2	4	4	5	4	5	4	3	3	3	4	5	3	4	4	4	4	5	4	4	4	5	4	4	4	3	5	4	3
222	Male	20-21	Year2	High	4	3	4	4	4	4	4	4	4	4	4	4	3	4	5	4	4	4	4	3	5	3	1	2	4	4	4	4	5	3	4	4	3	4	3	4	4	3	5	4	4	5	4	4	3
223	Female	22	Year2	High	5	3	4	3	3	3	4	5	3	4	4	4	3	4	3	3	3	3	4	4	4	4	4	3	3	3	2	4	3	4	4	3	3	4	3	5	3	4	4	4	4	3	5	3	4
224	Female	22	Year2	High	3	4	5	4	3	4	4	4	5	4	3	5	4	4	4	4	4	4	3	3	4	4	4	3	3	4	3	4	3	4	4	4	3	3	4	3	4	4	5	4	4	5	3	3	4
225	Female	22	Year2	Intermediate	4	4	5	3	4	3	4	5	4	4	4	4	4	4	3	4	4	4	4	4	3	4	3	4	4	3	3	3	4	4	4	4	3	5	4	3	4	4	4	4	4	5	4	5	4
226	Female	20-21	Year2	Intermediate	4	4	3	5	3	4	5	3	3	4	4	3	4	4	4	4	4	4	5	4	4	3	4	4	4	2	4	5	3	5	2	3	5	5	3	3	4	4	3	4	3	5	4	4	5
227	Male	20-21	Year2	Low	5	4	3	3	4	3	4	3	4	4	4	4	5	3	4	3	5	3	4	4	4	4	5	5	3	4	4	3	4	4	4	3	2	5	3	3	4	4	4	3	4	5	5	4	4
228	Female	18-19	Year2	Intermediate	5	4	4	4	3	3	4	2	5	3	4	4	3	4	5	3	4	3	3	2	5	5	3	4	4	4	4	4	4	5	4	3	5	5	3	4	4	4	4	4	4	4	3	4	4
229	Male	18-19	Year2	Intermediate	4	3	3	4	4	4	4	5	4	3	4	4	3	4	3	5	4	4	3	3	4	3	3	4	3	4	4	4	3	5	3	5	5	4	4	4	3	4	4	4	3	3	4	5	4
230	Male	22	Year2	Intermediate	3	4	4	5	5	4	5	5	5	4	4	4	4	5	3	4	4	3	3	4	3	3	4	4	3	3	3	4	4	3	4	3	4	3	4	4	4	3	4	4	4	4	4	5	5
231	Female	22	Year2	Intermediate	4	4	5	4	4	4	3	3	5	4	5	5	5	3	4	2	4	4	4	4	4	3	3	3	5	3	5	5	4	4	5	5	3	4	4	4	4	4	4	4	5	4	3	4	5
232	Female	22	Year2	Intermediate	3	4	4	4	4	4	4	4	3	4	4	4	3	3	4	5	4	3	4	5	4	3	3	2	3	4	5	4	4	5	4	3	3	4	5	3	4	3	5	4	4	4	3	4	4
233	Female	22	Year2	Low	5	5	4	5	4	4	4	3	3	4	3	5	5	4	4	5	3	5	4	5	4	4	5	4	2	5	3	4	4	5	5	4	3	5	4	3	4	4	3	3	5	4	3	3	4
234	Female	20-21	Year2	Low	4	4	4	3	4	4	4	4	4	3	4	4	4	4	3	4	3	5	4	4	3	3	4	4	4	4	4	4	4	4	5	4	4	5	3	4	4	5	4	4	3	4	4	3	4
235	Female	20-21	Year2	Intermediate	4	4	4	3	4	4	3	5	2	4	4	3	4	3	3	4	3	4	4	5	4	4	2	4	4	4	3	2	4	4	3	4	4	4	3	4	5	4	4	4	4	3	4	3	4
236	Female	22	Year2	Low	4	5	2	3	4	3	4	3	4	5	3	5	4	3	5	3	4	4	4	4	4	4	3	3	4	4	4	3	4	4	2	4	3	3	3	3	3	4	3	4	2	4	4	3	5
237	Female	22	Year2	High	3	4	3	4	4	3	4	4	3	5	5	4	4	5	4	3	4	3	3	3	4	4	4	4	4	3	4	3	4	3	4	5	5	3	3	4	4	5	4	4	4	4	4	3	4
238	Female	18-19	Year2	Intermediate	3	3	4	3	4	3	5	4	4	5	4	3	4	5	4	5	5	5	4	3	3	3	4	4	4	4	5	3	4	4	4	4	5	4	3	5	4	4	3	4	4	4	3	5	4
239	Male	20-21	Year2	Intermediate	5	4	5	4	3	5	4	4	4	4	4	5	3	2	4	4	4	3	3	2	3	4	3	5	3	4	4	3	3	3	3	5	4	4	4	4	4	4	3	4	4	3	5	4	4
240	Female	18-19	Year2	Intermediate	3	3	4	4	3	4	3	4	4	5	5	5	4	4	3	2	4	4	4	5	5	4	4	5	5	4	4	4	3	5	4	3	4	4	4	3	5	4	3	5	3	4	4	4	3
241	Female	22	Year2	High	3	3	3	4	3	4	4	4	3	3	3	4	4	5	4	4	3	2	4	5	3	4	5	4	3	4	4	4	4	4	4	4	3	5	3	5	5	3	3	4	5	4	4	5	4
242	Male	20-21	Year2	Intermediate	4	4	4	4	3	5	4	4	3	3	4	4	3	4	4	4	4	4	5	3	3	4	5	4	4	4	4	4	4	5	4	4	3	3	4	4	4	3	4	3	4	3	4	3	4
243	Female	18-19	Year2	Intermediate	5	3	3	4	3	3	3	4	5	2	4	4	5	4	5	5	5	3	3	4	4	5	4	3	4	4	5	3	4	3	3	3	4	3	3	4	4	4	3	4	4	4	3	3	3
244	Male	20-21	Year2	Intermediate	4	4	3	5	4	4	4	4	5	5	4	4	4	4	3	4	4	4	4	4	3	4	4	4	3	5	4	4	4	4	4	4	4	3	4	3	4	4	4	4	4	4	4	3	3
245	Male	20-21	Year2	Intermediate	4	3	3	3	3	4	4	4	3	3	3	5	4	3	4	3	4	3	5	3	3	5	2	4	3	4	3	2	3	3	4	3	3	3	3	5	4	5	4	3	3	4	4	4	4
246	Female	20-21	Year2	High	3	4	4	3	4	4	3	4	5	4	5	4	5	3	3	4	4	3	4	3	4	3	5	4	4	4	3	4	3	3	2	3	4	4	3	3	2	4	4	3	5	4	4	3	3
247	Male	18-19	Year2	High	3	4	3	3	4	4	4	3	4	3	4	4	3	4	4	4	3	3	4	4	3	4	3	4	3	3	4	4	4	5	4	2	3	3	4	4	4	4	4	4	4	3	4	4	4
248	Male	20-21	Year2	Intermediate	5	3	2	4	3	4	4	4	4	4	4	5	5	3	4	3	3	4	4	4	3	3	3	4	3	4	4	4	4	5	3	5	4	3	4	4	4	4	4	4	5	5	4	4	4
249	Male	20-21	Year2	High	4	4	4	4	4	4	3	4	4	4	3	4	2	4	3	5	4	3	5	3	5	3	4	5	4	4	3	3	4	4	4	4	4	4	3	4	4	4	4	5	5	4	4	5	4
250	Male	20-21	Year2	High	4	4	5	4	4	4	4	4	3	3	5	4	3	4	4	4	4	3	3	4	4	5	5	4	4	4	4	4	5	4	3	5	2	3	4	4	4	5	4	4	3	4	4	4	4
251	Female	20-21	Year2	Intermediate	5	3	4	5	3	3	5	4	4	4	4	4	4	3	3	4	4	4	3	5	3	3	5	4	3	5	3	3	2	4	4	4	4	3	3	4	4	4	3	5	5	4	4	4	3
252	Male	22	Year2	High	4	3	3	3	4	4	4	5	4	3	4	4	4	3	3	4	4	5	4	4	4	5	4	3	5	4	4	3	5	4	3	4	4	3	4	4	3	3	3	4	4	4	4	3	4
253	Female	20-21	Year2	Intermediate	4	3	4	5	3	3	4	4	4	3	4	4	4	5	4	3	4	4	2	4	4	3	4	4	3	5	4	4	4	3	3	3	3	4	4	4	4	3	4	3	3	5	4	5	5
254	Male	20-21	Year2	Intermediate	5	3	4	5	4	2	4	4	3	3	4	4	4	4	5	3	3	3	5	4	4	3	4	4	3	3	4	5	4	3	4	3	3	4	4	3	5	3	3	4	4	4	5	4	4
255	Male	22	Year2	Intermediate	3	4	4	4	3	4	4	4	3	3	5	4	4	3	4	4	4	4	5	4	4	4	3	4	4	4	4	4	1	5	3	4	3	5	4	5	3	3	4	4	3	4	4	4	4
256	Male	20-21	Year2	Intermediate	4	4	4	5	3	4	4	2	3	4	3	5	3	5	4	4	4	4	3	3	4	4	5	5	4	3	5	3	5	5	4	4	3	4	4	3	3	4	4	4	5	4	3	4	5
257	Male	18-19	Year2	Low	4	4	3	3	4	4	3	4	4	3	4	3	3	5	4	5	4	4	4	4	2	4	3	3	5	2	3	4	3	5	3	3	4	5	3	4	4	4	4	4	4	5	3	5	4
258	Female	18-19	Year2	High	4	3	4	4	4	3	5	4	3	3	3	3	4	4	4	4	3	4	4	4	3	4	5	3	3	4	4	4	3	4	3	3	4	4	4	4	4	5	3	3	4	5	5	4	4
259	Female	20-21	Year2	High	5	4	4	3	4	4	4	4	4	4	4	5	4	3	3	4	3	4	4	3	4	3	5	4	4	3	4	4	4	4	4	3	2	3	4	5	5	3	4	3	5	4	4	4	5
260	Male	20-21	Year2	Low	4	3	5	4	3	2	4	4	5	4	4	4	5	4	5	4	5	4	4	5	4	4	4	4	4	4	4	5	4	3	3	5	4	4	5	5	3	5	4	4	3	4	4	4	3
261	Male	20-21	Year2	High	4	4	4	3	4	5	4	4	5	5	4	2	3	4	4	4	4	4	4	5	3	4	5	4	4	4	4	3	4	3	3	5	4	4	4	4	4	4	3	3	3	4	5	4	3
262	Female	18-19	Year2	Low	5	4	4	4	4	3	3	3	4	5	4	3	4	4	4	4	3	5	4	3	4	3	5	5	4	5	4	4	4	3	4	4	5	4	3	4	3	4	3	4	4	4	4	4	4
263	Male	18-19	Year2	Intermediate	4	5	4	5	4	5	4	3	4	3	3	3	4	4	3	4	4	4	4	4	3	3	4	3	4	3	4	5	4	5	4	4	3	3	3	5	5	3	4	4	5	5	4	4	4
264	Male	18-19	Year2	Intermediate	3	3	5	4	4	4	3	4	5	4	4	3	5	3	4	4	4	3	4	4	4	4	3	3	3	4	4	5	4	5	4	4	3	4	4	4	4	4	4	3	3	4	3	3	4
265	Male	20-21	Year2	Low	3	2	4	4	3	3	5	5	4	4	3	2	4	3	4	3	4	5	3	3	4	3	2	4	5	4	3	2	4	4	4	3	4	3	5	3	4	3	4	4	3	5	4	3	4
266	Female	20-21	Year2	High	3	4	3	3	5	3	3	4	4	3	4	4	4	4	3	4	5	3	5	4	4	5	5	4	3	4	4	4	3	3	4	5	4	3	5	4	3	4	4	5	3	4	4	4	4
267	Female	20-21	Year2	High	5	5	5	3	3	4	3	4	3	3	4	3	4	4	3	4	4	3	3	4	3	4	3	4	3	3	4	5	3	4	4	5	2	3	3	3	3	4	3	3	4	4	4	4	5
268	Female	20-21	Year2	Intermediate	3	5	4	5	4	3	4	4	4	4	3	4	4	3	3	3	3	3	4	3	3	3	5	4	4	3	4	5	4	4	4	3	3	4	3	4	4	4	3	4	4	5	3	5	5
269	Male	22	Year2	Low	4	4	4	4	5	4	5	3	4	4	4	3	4	3	4	5	4	5	4	4	3	4	3	4	5	3	4	4	4	2	2	4	4	3	3	5	3	4	4	4	4	4	5	3	5
270	Male	18-19	Year2	Intermediate	4	4	4	4	4	4	4	4	3	4	3	4	3	4	3	3	4	5	3	3	4	5	5	4	4	3	4	4	4	4	3	3	3	3	4	4	4	4	3	4	4	4	4	4	5
271	Female	20-21	Year2	Intermediate	4	4	4	4	4	3	3	3	4	4	4	4	3	4	3	3	3	5	4	4	3	5	3	4	4	4	4	3	3	3	5	3	5	4	5	3	5	4	3	3	4	4	4	4	4
272	Female	20-21	Year2	High	4	3	4	3	4	2	5	4	4	3	3	5	4	4	3	4	4	4	4	3	4	4	3	4	5	5	4	5	4	3	4	5	3	3	4	5	4	4	4	4	4	5	4	4	3
273	Female	20-21	Year2	Intermediate	4	4	4	3	4	4	4	4	4	3	4	5	5	4	4	4	3	5	3	4	4	4	4	4	4	3	4	4	3	4	4	3	3	3	3	3	3	4	4	3	4	4	4	4	4
274	Female	20-21	Year2	Intermediate	3	4	4	5	3	3	4	4	2	4	3	4	5	4	4	4	4	4	4	5	4	3	3	3	3	4	3	3	4	3	4	4	4	4	3	3	4	4	4	5	4	4	3	4	5
275	Male	22	Year2	Intermediate	4	4	5	3	3	3	4	3	4	4	4	4	3	5	5	4	3	4	4	4	3	3	4	4	3	3	4	4	4	4	4	4	5	4	3	4	3	4	4	4	4	5	4	3	4
276	Female	22	Year2	Intermediate	4	5	5	4	4	4	5	4	4	3	4	5	3	3	4	4	3	4	3	3	5	3	4	4	5	4	4	4	5	4	3	4	4	3	3	4	5	4	4	4	4	5	3	3	5
277	Male	18-19	Year2	Intermediate	4	4	4	4	5	5	5	5	3	4	3	3	5	4	4	3	4	4	5	3	2	5	4	5	4	4	4	4	3	2	5	4	5	4	3	4	5	4	4	4	4	3	5	4	4
278	Female	22	Year2	Low	5	4	4	3	4	4	3	3	4	3	4	3	3	3	5	4	4	4	3	3	4	3	4	4	5	3	3	3	5	5	4	4	5	4	4	4	4	4	3	3	3	3	4	4	2
279	Male	20-21	Year2	Intermediate	4	4	3	4	3	4	5	4	3	3	3	4	4	3	3	5	4	4	4	4	4	4	3	3	4	4	3	3	4	3	3	5	3	5	4	5	3	4	3	3	2	5	4	4	4
280	Female	18-19	Year2	Intermediate	4	3	4	4	4	4	4	4	4	4	4	5	3	3	3	3	3	4	3	4	3	4	3	5	3	4	4	3	4	3	3	3	4	4	5	4	4	3	5	5	4	4	4	3	5
281	Female	20-21	Year2	High	4	3	5	4	3	3	4	4	4	3	5	4	5	4	3	4	3	4	3	3	5	3	5	4	4	2	4	4	4	4	5	4	3	3	4	5	4	4	3	4	4	4	4	3	4
282	Female	22	Year2	Intermediate	5	4	4	5	3	4	3	3	3	3	5	4	3	4	5	3	3	4	4	3	4	3	4	4	3	5	4	4	3	4	4	4	4	3	2	4	4	5	4	4	4	4	4	4	5
283	Female	20-21	Year2	Intermediate	4	4	3	3	4	4	4	2	5	5	4	3	5	4	4	4	4	5	4	4	4	5	2	4	3	4	4	4	4	5	4	2	4	4	3	3	5	4	5	4	4	5	5	4	3
284	Male	18-19	Year2	High	3	4	3	4	3	4	3	5	4	3	4	4	4	3	3	3	4	2	4	4	4	3	3	4	5	4	4	5	3	4	4	3	5	4	4	4	3	4	4	5	4	5	5	4	3
285	Female	20-21	Year2	Low	4	3	3	4	5	3	4	4	3	5	3	4	4	4	4	4	4	4	5	5	5	4	4	4	4	3	3	4	3	4	3	3	5	3	4	5	4	4	4	3	4	4	4	5	4
286	Male	18-19	Year2	High	3	5	3	4	4	3	5	3	4	4	5	4	3	3	4	4	4	4	5	4	5	3	5	3	4	3	3	4	4	4	4	4	4	3	4	4	4	4	3	4	4	4	3	3	4
287	Male	18-19	Year2	Intermediate	4	4	4	4	5	3	3	3	4	4	4	3	2	4	4	4	5	5	4	5	4	4	4	4	3	4	4	4	3	4	3	3	4	3	4	4	4	4	3	5	4	4	4	4	5
288	Male	18-19	Year2	Low	4	4	3	3	4	4	4	5	4	4	4	3	4	3	4	3	3	4	3	3	3	4	3	3	5	4	3	4	3	4	3	3	4	4	4	4	3	4	4	4	5	4	4	4	4
289	Male	18-19	Year2	Intermediate	5	4	4	4	4	4	5	5	3	5	5	3	4	5	3	4	4	4	4	3	4	3	5	4	5	4	4	5	3	2	5	4	4	3	4	4	4	5	5	5	3	5	3	4	3
290	Female	18-19	Year2	Intermediate	4	4	4	3	3	5	4	4	4	3	4	4	3	3	4	4	5	4	4	3	3	3	4	3	5	4	4	4	3	4	4	3	4	4	4	3	3	4	4	4	4	5	5	4	4
291	Male	18-19	Year2	Low	4	4	3	4	4	4	4	4	3	3	4	3	3	3	3	4	5	5	4	5	4	4	5	4	5	4	3	3	5	5	4	2	5	4	4	4	5	4	4	4	3	4	3	3	4
292	Male	20-21	Year2	Intermediate	5	3	5	4	4	4	4	4	4	3	4	3	4	5	4	3	3	4	3	5	4	3	3	4	3	5	3	4	3	5	4	4	5	3	5	5	3	5	4	3	4	5	4	4	3
293	Male	18-19	Year2	Intermediate	4	3	4	4	5	5	4	4	5	4	3	4	4	4	4	4	4	4	5	3	3	3	2	4	3	4	5	5	3	3	4	3	4	5	4	4	4	4	4	3	3	4	4	4	4
294	Female	18-19	Year2	Intermediate	5	4	4	4	3	4	4	5	4	3	4	4	4	3	3	5	4	5	4	3	4	3	3	4	3	3	3	3	4	4	3	3	4	4	4	3	4	3	4	4	3	3	4	3	4
295	Female	22	Year2	Low	4	3	3	4	4	5	3	3	4	4	3	4	4	4	3	3	4	2	3	3	3	4	2	3	3	4	4	5	4	3	3	4	4	3	4	3	4	4	4	4	4	5	3	4	4
296	Female	20-21	Year2	High	3	3	4	4	4	4	3	3	2	5	3	4	3	4	4	3	3	3	3	3	4	4	5	4	4	4	5	4	5	5	4	4	3	4	5	5	4	4	4	4	4	4	3	3	4
297	Female	20-21	Year2	High	4	4	3	3	3	3	4	4	5	4	3	4	4	3	3	3	3	5	4	4	3	5	4	4	3	4	4	4	4	3	3	4	4	4	3	4	5	4	4	4	4	3	5	4	3
298	Male	18-19	Year2	High	4	4	4	3	4	3	4	4	3	4	4	4	5	3	4	5	3	5	5	4	4	3	3	4	5	3	4	4	4	4	4	5	5	4	5	4	3	4	5	4	4	4	4	2	4
299	Male	18-19	Year2	Intermediate	5	4	4	5	3	3	4	5	3	3	3	4	4	5	4	3	3	4	3	4	4	5	4	3	5	4	4	3	4	3	5	5	3	4	3	3	4	4	4	4	4	4	3	5	4
300	Female	18-19	Year2	Low	4	4	4	5	4	4	4	3	4	4	3	3	4	4	5	5	4	3	4	3	4	3	4	3	4	5	3	4	4	4	5	2	5	3	3	4	3	4	5	4	4	4	3	4	5
301	Male	18-19	Year2	Intermediate	4	4	3	4	4	5	4	4	5	3	3	4	5	3	4	3	3	3	2	5	3	4	4	3	5	4	4	4	4	4	4	4	5	3	4	5	4	4	3	3	5	3	5	3	3
302	Male	18-19	Year2	Low	3	4	3	4	3	5	4	3	4	5	4	4	3	5	4	3	3	3	4	3	4	3	5	4	5	4	4	3	4	4	4	3	4	3	4	4	4	4	5	4	4	4	4	4	3
303	Male	18-19	Year2	Low	4	4	4	3	4	4	4	4	4	5	3	3	4	4	4	3	3	5	5	4	4	3	4	5	3	4	3	3	5	3	4	3	4	3	3	4	3	5	4	3	4	3	4	3	4
304	Female	18-19	Year2	Intermediate	3	4	3	5	4	5	3	3	4	4	3	4	5	3	3	3	4	3	3	3	3	3	3	3	2	4	3	4	4	4	4	4	3	3	3	3	3	4	3	4	5	4	4	3	4
305	Female	18-19	Year2	Intermediate	3	4	4	4	4	3	4	4	3	4	5	3	4	3	4	4	5	4	3	4	4	4	4	4	4	3	3	3	3	4	3	3	4	3	4	5	5	3	4	4	4	3	3	5	5
306	Male	20-21	Year2	Intermediate	4	3	3	5	3	3	4	3	4	4	3	4	4	4	4	3	4	3	4	4	5	4	4	5	3	3	4	5	3	4	5	3	5	4	5	4	4	3	4	3	3	4	3	5	4
307	Female	18-19	Year2	Intermediate	5	2	4	3	4	4	4	4	4	5	4	5	3	4	4	3	4	4	3	4	4	4	4	4	4	4	4	5	3	4	4	4	3	5	5	4	4	4	3	4	4	4	3	4	4
308	Female	20-21	Year2	Intermediate	4	4	3	4	5	4	5	4	4	3	4	4	3	3	4	5	4	3	4	4	4	3	5	5	4	3	4	5	4	3	4	4	4	4	4	4	4	3	4	4	4	4	4	5	4
309	Female	20-21	Year2	Intermediate	3	5	4	4	4	4	4	3	4	4	4	4	4	5	4	5	5	4	3	4	4	3	3	4	4	4	3	4	2	4	5	4	3	5	2	4	4	4	4	4	4	5	4	4	3
310	Female	20-21	Year2	High	4	4	4	4	4	4	4	5	4	3	4	4	4	4	4	4	4	3	3	3	4	3	3	3	4	4	3	4	4	3	4	3	3	4	4	4	4	3	4	4	3	3	5	3	4
311	Female	18-19	Year2	Intermediate	5	4	3	4	3	4	3	5	4	4	4	4	5	5	4	4	3	3	2	4	4	4	4	4	3	5	4	3	4	5	3	4	5	4	4	3	4	4	4	3	4	4	4	3	4
312	Male	22	Year2	Intermediate	3	5	4	3	4	5	4	4	4	4	4	4	5	5	3	4	3	4	4	4	2	4	3	4	4	4	4	4	5	4	4	4	4	4	3	4	4	3	4	4	4	4	3	5	4
313	Female	20-21	Year2	Low	4	4	4	4	3	5	4	3	4	3	3	3	4	3	4	3	3	3	4	4	3	3	4	4	3	4	4	4	3	4	3	4	3	4	3	4	3	4	5	3	5	4	5	3	4
314	Male	18-19	Year2	High	4	4	4	4	3	4	3	5	3	4	5	3	5	4	5	3	4	5	3	4	4	4	3	4	4	5	3	4	3	3	4	3	5	3	4	4	4	4	3	4	4	4	5	5	4
315	Male	22	Year2	Intermediate	3	3	3	3	3	4	4	3	4	3	4	3	4	3	4	4	3	2	4	3	3	5	3	4	4	3	4	5	4	4	4	3	5	4	3	4	3	4	4	4	4	5	4	4	3
316	Female	22	Year2	Low	4	4	3	5	5	4	4	4	4	3	5	4	4	3	4	3	4	3	4	3	4	3	5	2	3	4	4	3	4	5	4	4	4	4	5	3	4	3	4	4	4	3	3	5	4
317	Male	18-19	Year2	Low	4	4	4	5	4	4	4	4	4	4	2	4	4	4	5	3	3	4	4	2	4	3	3	3	4	5	4	4	3	3	5	5	3	4	5	4	3	3	3	4	5	3	5	4	3
318	Male	18-19	Year2	Intermediate	4	5	3	4	4	4	4	5	4	3	4	5	4	4	3	5	3	4	4	4	3	4	3	2	4	4	4	4	4	3	3	4	4	4	4	3	4	4	4	3	3	5	4	4	4
319	Male	22	Year2	Intermediate	3	4	4	4	3	3	4	4	3	4	5	4	4	4	3	5	3	3	4	4	4	3	5	4	3	5	4	3	3	4	4	4	4	4	4	4	3	3	3	4	3	3	4	5	5
320	Female	20-21	Year2	Intermediate	4	4	4	4	4	4	5	4	4	3	4	5	3	4	5	4	5	3	3	4	4	4	3	4	4	4	4	4	4	3	4	4	4	4	3	3	4	4	4	4	4	4	5	5	5
321	Female	18-19	Year2	High	4	4	4	3	4	3	3	3	4	4	4	3	3	5	4	5	4	3	5	4	5	3	3	4	3	3	5	4	2	3	3	4	3	4	4	5	4	5	4	5	4	3	4	4	3
322	Male	18-19	Year2	Low	4	4	4	4	4	4	4	4	4	4	4	5	4	4	4	4	5	4	3	2	3	5	4	3	3	4	4	4	4	3	4	3	4	4	5	4	5	4	3	5	4	3	3	3	4
323	Female	20-21	Year2	Intermediate	5	3	4	3	3	3	4	3	4	3	3	4	3	3	3	3	4	5	4	3	5	4	4	4	3	4	3	5	3	3	2	2	4	3	4	3	3	3	4	5	4	4	4	4	4
324	Female	20-21	Year2	High	4	2	4	4	3	4	3	4	4	4	4	4	4	4	4	4	3	4	4	4	4	3	5	4	5	4	5	3	4	3	3	5	5	3	4	4	4	4	3	3	4	4	3	3	3
325	Female	20-21	Year2	Intermediate	4	3	4	3	4	4	4	3	3	4	4	3	4	4	4	4	5	5	4	4	3	3	3	3	3	3	3	5	5	2	4	5	4	5	4	4	4	4	3	4	4	3	2	4	4
326	Female	20-21	Year2	Intermediate	4	3	4	5	4	3	5	3	3	3	3	4	4	2	3	4	4	4	4	4	4	3	4	3	4	3	4	4	4	3	4	3	3	4	4	3	4	5	3	4	5	4	3	3	4
327	Male	20-21	Year2	Intermediate	3	4	4	4	2	4	4	5	3	3	5	3	3	4	4	4	4	5	4	4	4	5	3	4	5	3	4	3	5	4	3	3	4	3	4	3	4	5	5	4	4	4	4	5	4
328	Male	20-21	Year2	Intermediate	3	4	3	4	4	3	4	4	4	5	4	4	5	4	4	4	4	2	3	4	4	3	3	5	4	4	3	3	4	3	4	4	3	4	4	4	4	4	3	4	5	3	3	4	3
329	Female	18-19	Year2	High	3	4	4	3	4	4	4	3	5	3	4	4	5	4	4	3	2	4	4	4	4	3	5	5	5	5	5	2	3	4	3	4	4	4	4	3	4	4	4	5	5	4	4	3	4
330	Female	18-19	Year2	Intermediate	5	5	4	4	4	4	3	4	4	4	4	4	4	4	3	3	5	5	3	3	3	3	3	4	5	5	2	3	5	5	4	4	4	4	4	5	3	5	3	3	5	5	3	5	4
331	Male	20-21	Year2	High	3	4	3	5	4	4	3	4	4	4	4	3	4	3	5	3	4	3	3	4	3	4	4	3	4	5	2	4	4	4	5	4	4	3	4	4	4	3	4	4	4	4	4	4	4
332	Male	22	Year2	Low	5	4	4	2	4	3	3	3	5	5	3	4	4	4	4	4	4	5	3	3	4	4	4	4	4	4	4	4	4	4	5	3	4	4	4	4	4	5	4	5	5	4	3	4	4
333	Female	20-21	Year2	Low	3	4	4	5	3	3	3	4	4	3	3	4	4	3	4	3	4	5	5	3	4	3	3	3	4	3	4	5	4	3	4	3	4	4	3	5	5	4	4	4	4	4	4	5	4
334	Male	20-21	Year2	Low	4	3	4	4	3	4	5	3	4	4	4	4	4	4	4	3	4	3	5	3	4	3	4	3	3	3	3	3	4	5	4	4	4	4	3	4	4	4	4	4	3	4	3	4	4
335	Female	18-19	Year2	Intermediate	5	4	4	3	4	4	4	5	3	3	3	4	4	5	4	3	3	3	4	4	4	4	4	2	3	4	4	4	4	3	3	4	3	4	3	2	2	5	3	5	4	5	3	3	4
336	Female	20-21	Year2	Intermediate	5	4	5	3	4	5	4	4	4	4	4	5	4	3	3	4	4	3	5	4	4	3	2	4	3	3	2	3	3	4	3	4	3	4	3	4	4	4	4	4	3	5	5	4	4
337	Male	20-21	Year2	High	5	4	5	5	5	3	4	4	3	3	4	5	5	3	4	3	3	3	4	4	3	4	4	3	5	4	4	3	4	5	4	3	2	3	3	3	4	3	4	4	4	4	3	3	4
338	Male	18-19	Year2	Intermediate	5	3	3	3	4	5	3	3	3	3	5	5	3	3	4	4	4	3	3	4	5	4	3	4	3	4	4	4	4	4	3	5	5	3	3	3	4	4	4	4	4	4	5	3	3
339	Female	18-19	Year2	High	4	3	4	3	4	2	3	4	4	4	2	4	4	4	5	5	4	4	3	3	4	4	5	2	3	4	4	3	4	4	4	3	4	5	5	4	4	4	4	3	4	3	4	4	4
340	Female	20-21	Year2	Low	4	4	5	5	4	3	4	4	3	3	4	4	3	3	4	4	4	3	4	4	4	4	3	4	3	4	4	3	4	4	5	4	4	4	4	4	4	4	4	4	4	3	4	4	4
341	Male	18-19	Year2	High	4	4	4	4	3	3	4	4	4	4	5	2	5	4	4	5	4	4	4	3	4	2	4	2	4	3	4	4	4	4	4	2	5	4	4	4	4	5	3	4	4	4	5	4	4
342	Female	18-19	Year2	Intermediate	3	3	5	3	4	3	4	4	3	4	4	3	3	4	4	5	3	4	4	4	4	3	4	4	4	4	4	4	3	4	4	3	3	4	4	5	3	4	4	3	5	4	4	5	4
343	Male	18-19	Year2	Intermediate	3	3	5	4	5	3	4	4	4	4	4	4	3	4	3	4	3	3	5	5	4	4	4	4	4	3	2	5	3	4	3	5	3	5	5	4	5	4	4	5	4	5	4	4	4
344	Female	18-19	Year2	High	4	5	4	3	3	4	4	3	5	4	4	3	4	3	4	4	4	5	4	4	4	3	4	4	4	3	5	4	4	3	4	4	4	3	3	4	5	5	4	4	4	4	5	4	3
345	Male	18-19	Year2	Intermediate	4	3	4	5	5	4	4	4	3	4	3	3	5	4	4	4	4	4	3	3	4	3	3	4	3	4	5	5	3	3	3	3	4	3	4	4	3	4	4	4	4	4	4	3	4
346	Male	22	Year2	Intermediate	4	5	4	4	4	4	4	3	4	4	2	3	4	4	3	4	2	4	3	3	5	5	5	3	3	5	3	4	4	3	3	3	3	3	4	5	3	4	3	3	3	5	4	4	4
347	Male	20-21	Year2	Low	4	3	4	4	5	4	3	4	3	3	4	4	4	4	4	3	4	3	4	4	4	5	4	4	5	4	4	4	3	3	4	4	4	5	5	4	4	3	5	3	3	3	4	4	3
348	Female	20-21	Year2	Low	4	4	4	4	3	4	4	4	4	4	3	4	4	4	5	2	3	4	4	3	4	4	5	4	4	4	4	3	3	3	4	4	3	3	5	4	3	4	4	4	5	5	3	3	3
349	Female	20-21	Year2	High	4	4	4	5	4	4	3	3	4	3	3	5	5	4	4	4	4	5	4	4	3	5	4	2	5	4	4	4	4	4	3	5	3	4	4	3	4	3	4	4	4	3	5	4	4
350	Male	20-21	Year2	Intermediate	5	4	5	4	3	4	4	5	4	3	4	4	3	4	5	3	3	4	5	4	5	2	4	3	4	4	2	4	4	4	3	3	4	3	5	5	5	4	3	3	4	5	5	4	5
351	Female	18-19	Year2	High	3	4	3	3	3	3	4	4	4	3	5	3	4	5	4	3	3	5	5	4	4	3	3	4	3	3	3	5	3	4	3	3	2	3	4	4	4	4	4	4	4	4	5	4	4
352	Male	20-21	Year2	Intermediate	4	4	5	4	4	4	5	3	5	5	5	3	4	3	4	4	4	4	4	3	3	3	3	4	4	3	3	4	4	2	3	4	3	4	4	5	5	4	4	4	4	3	5	4	3
353	Male	20-21	Year2	Low	3	4	4	5	4	3	4	4	3	3	4	3	3	5	3	4	4	5	3	5	3	4	5	5	3	4	4	5	5	4	3	3	3	3	5	4	4	3	4	4	4	4	4	4	4
354	Female	20-21	Year2	Low	3	3	3	3	3	3	3	4	4	5	4	3	4	4	4	3	3	4	3	5	4	3	5	3	3	4	3	3	4	3	3	3	4	3	4	4	4	4	5	4	5	4	4	4	4
355	Female	20-21	Year2	Intermediate	4	4	4	4	3	4	4	4	5	5	3	3	5	4	4	4	4	4	3	4	4	2	3	3	4	4	4	4	4	4	4	4	4	5	3	4	4	3	4	4	5	4	3	3	4
356	Male	18-19	Year2	Intermediate	4	4	3	4	4	3	4	4	4	3	4	4	4	3	4	4	4	3	4	4	3	4	2	2	4	4	3	4	3	3	4	4	4	4	4	3	4	4	4	4	3	4	5	4	4
357	Female	18-19	Year2	Low	5	4	4	4	4	4	5	4	5	3	5	3	4	4	5	3	4	4	5	4	4	4	4	5	3	4	3	5	4	4	4	4	2	4	4	4	4	5	4	4	4	4	4	4	4
358	Female	20-21	Year2	Intermediate	4	3	4	3	4	4	3	4	4	5	4	4	4	3	4	5	4	3	4	4	3	5	4	4	4	4	4	4	5	4	3	3	3	4	4	4	4	3	4	3	4	3	4	3	4
359	Male	20-21	Year2	Low	3	2	3	5	4	4	3	4	4	5	2	4	4	4	4	3	5	3	5	3	5	3	4	3	3	4	4	4	3	2	3	4	4	4	4	4	3	4	4	4	4	3	4	5	4
360	Male	20-21	Year2	Intermediate	5	4	4	5	4	3	4	3	4	4	4	4	3	3	4	5	4	5	4	3	3	3	4	4	3	5	4	4	3	3	4	3	4	3	4	5	4	4	4	4	3	5	3	4	3
361	Female	20-21	Year2	Intermediate	5	5	5	4	5	4	3	4	5	4	4	5	4	4	3	3	4	4	4	3	3	2	4	4	4	4	4	3	4	4	4	3	4	4	4	3	3	4	3	4	3	3	3	3	5
362	Male	22	Year2	High	4	4	4	3	4	5	4	5	4	3	3	3	4	4	4	4	4	3	4	4	3	4	4	4	3	5	3	5	4	4	4	4	3	4	4	4	4	4	4	3	4	5	4	3	5
363	Male	20-21	Year2	Intermediate	4	4	3	3	4	4	4	3	4	4	4	4	4	4	3	2	4	4	2	3	5	4	4	5	5	4	4	3	4	3	4	5	4	3	3	5	4	4	4	4	3	5	4	4	4
364	Female	18-19	Year2	Intermediate	3	4	5	4	3	5	4	3	5	3	4	4	4	3	4	4	4	3	3	2	4	3	3	4	5	4	4	2	3	3	5	4	3	4	4	4	3	4	3	3	4	5	4	4	3
365	Male	18-19	Year2	Low	4	4	5	5	4	5	4	4	4	3	4	4	4	3	4	4	4	5	4	4	3	5	4	3	5	3	2	4	4	4	4	4	3	3	5	4	4	5	4	4	4	4	5	4	4
366	Male	18-19	Year2	Low	5	4	4	4	4	5	3	3	3	3	3	4	4	4	4	4	4	3	4	4	4	4	5	3	3	3	4	5	4	3	5	5	4	4	3	5	3	4	3	4	4	3	4	3	4
367	Female	18-19	Year2	Intermediate	5	3	4	4	4	3	4	2	4	4	4	4	5	3	3	3	3	4	3	5	3	4	4	3	3	3	4	4	3	3	5	5	5	4	4	4	4	4	3	4	5	3	4	5	4
368	Female	18-19	Year2	Intermediate	5	5	5	3	4	4	4	4	4	3	4	3	4	5	4	3	3	5	2	4	4	3	4	3	4	3	4	4	4	3	5	4	4	3	3	4	3	4	4	5	3	4	4	5	3
369	Male	18-19	Year2	Intermediate	4	4	3	3	3	4	4	4	5	4	3	4	4	4	4	5	3	3	4	3	5	4	4	4	4	4	4	4	5	3	3	5	5	2	4	4	4	4	4	4	4	3	4	4	3
370	Male	18-19	Year2	Intermediate	3	4	4	4	4	3	4	4	4	3	3	4	4	4	4	4	4	4	4	2	4	2	4	4	3	3	2	4	4	3	4	4	5	3	4	4	4	4	4	4	4	4	3	4	4
371	Female	18-19	Year2	Intermediate	4	4	5	4	4	4	4	4	5	3	5	4	4	5	3	5	3	3	3	3	4	4	2	3	3	4	3	3	4	3	3	4	3	5	4	3	5	4	5	4	4	4	4	4	4
372	Female	22	Year2	High	3	4	5	3	5	4	4	4	3	4	4	4	4	4	3	3	4	5	4	3	4	4	4	3	4	5	5	2	4	4	3	5	4	4	5	5	4	4	4	4	5	3	4	4	4
373	Female	18-19	Year2	Intermediate	4	4	4	5	4	4	4	4	4	4	4	4	4	3	4	3	4	4	4	4	5	5	4	5	3	4	4	4	3	3	5	3	4	4	5	3	3	4	4	5	4	3	4	4	4
374	Female	20-21	Year2	Low	4	4	3	4	4	3	4	4	4	4	4	5	3	4	3	4	5	4	4	4	5	3	5	3	4	5	4	5	3	4	4	3	5	2	4	5	4	4	4	4	4	4	4	5	4
375	Male	20-21	Year2	Intermediate	4	4	5	5	4	4	3	3	4	4	4	3	3	4	4	3	4	3	2	5	4	4	4	2	4	3	4	4	4	4	3	4	5	3	4	4	4	5	4	4	4	4	4	4	4
376	Female	22	Year2	Low	3	3	4	3	4	3	4	4	4	4	3	4	3	4	4	3	3	4	3	3	4	4	3	3	5	4	4	4	3	4	3	4	4	3	4	5	4	4	4	5	4	3	4	4	4
377	Female	18-19	Year2	Low	4	4	4	3	5	4	4	4	4	5	4	3	4	5	4	5	3	4	4	4	3	4	4	3	3	3	4	5	3	4	3	4	4	4	3	3	4	3	4	5	3	4	3	4	4
378	Male	20-21	Year2	High	4	5	4	4	3	4	4	5	4	4	3	4	4	4	4	3	3	5	4	4	4	3	3	4	4	4	4	4	5	4	3	5	3	5	4	5	3	4	4	4	4	4	5	4	4
379	Female	22	Year2	Low	3	3	5	4	4	4	3	3	4	4	3	3	5	4	3	3	3	3	4	2	3	2	3	4	3	2	4	4	5	5	4	3	4	4	4	4	4	3	4	5	4	4	5	5	5
380	Male	22	Year2	Intermediate	2	3	4	5	3	4	3	4	4	3	4	4	3	4	3	5	4	4	4	5	4	4	3	4	3	3	5	3	4	4	5	4	3	5	3	4	4	4	3	4	4	4	3	4	4
381	Female	22	Year2	Intermediate	4	4	4	4	4	3	3	4	3	4	4	3	3	3	3	3	3	4	3	4	2	4	4	5	3	4	4	5	4	4	3	4	3	4	4	4	5	3	4	5	3	3	4	4	3
382	Female	18-19	Year2	Intermediate	5	4	4	4	5	5	4	3	4	4	4	3	5	4	5	4	5	4	4	4	4	3	5	3	4	5	5	4	4	3	5	4	4	5	5	4	4	3	4	4	3	5	3	4	4
383	Female	18-19	Year2	Intermediate	5	4	4	3	3	3	4	4	4	5	4	3	4	5	5	4	3	4	3	3	3	4	4	4	4	4	3	3	5	3	4	2	4	5	3	3	3	4	4	4	4	4	4	3	4
384	Male	20-21	Year2	Low	4	4	4	5	2	3	4	3	4	4	5	4	4	4	5	2	5	4	4	5	5	4	4	5	5	3	5	3	5	3	4	3	4	4	4	4	5	5	4	4	5	4	4	5	4
385	Male	22	Year2	Intermediate	3	4	2	3	4	4	4	3	4	3	4	5	5	4	4	4	5	4	3	3	4	3	4	3	4	3	3	5	3	4	4	4	4	3	3	4	4	3	4	4	3	4	4	4	5
386	Female	20-21	Year2	Intermediate	4	5	4	5	4	4	4	4	4	5	4	4	3	4	3	4	4	4	4	4	5	2	4	4	3	5	4	3	4	4	4	5	3	3	3	4	3	4	4	4	5	4	3	5	4
387	Male	20-21	Year2	Low	3	3	4	4	4	4	4	4	4	3	4	4	4	4	2	4	3	4	4	4	3	3	4	4	5	3	4	5	3	3	5	3	3	4	4	4	4	4	3	4	5	4	3	4	3
388	Male	18-19	Year2	Intermediate	4	3	3	5	4	4	4	4	5	4	3	5	4	4	3	4	4	2	4	3	4	5	2	4	4	3	3	2	5	4	4	3	3	4	4	4	5	5	4	4	4	3	4	5	5
389	Male	20-21	Year2	Low	4	4	4	4	4	4	4	4	3	4	4	4	3	4	4	3	3	4	3	5	5	4	4	3	3	5	4	5	4	3	3	4	4	5	4	3	3	4	4	5	4	3	4	2	2
390	Male	18-19	Year2	Low	5	3	4	4	3	4	4	3	3	4	5	3	4	4	5	4	4	3	3	4	4	4	3	3	5	4	4	4	3	4	4	2	4	3	3	4	5	5	3	4	4	3	3	3	5
391	Male	18-19	Year2	Intermediate	4	4	5	4	4	5	5	4	5	3	4	4	4	4	4	3	4	4	3	4	4	4	5	3	4	5	3	4	4	3	4	3	4	4	4	4	3	4	4	4	4	4	5	4	4
392	Male	20-21	Year2	Low	4	5	5	4	3	4	3	3	3	5	5	4	4	4	4	3	3	5	4	3	4	4	4	3	4	3	5	4	4	3	4	3	3	3	5	4	3	3	5	4	3	3	5	3	4
393	Female	20-21	Year2	Intermediate	3	4	4	4	5	4	4	5	3	3	3	4	4	3	3	3	3	3	2	5	3	5	4	3	3	3	3	5	4	3	4	5	3	3	4	4	3	4	3	5	4	4	4	4	4
394	Female	18-19	Year2	Intermediate	3	4	4	4	4	3	4	3	4	3	3	3	4	4	3	3	2	4	4	3	4	3	3	4	5	4	5	4	4	4	3	3	3	4	4	3	5	4	4	4	4	4	3	4	4
395	Male	18-19	Year2	High	4	3	4	3	3	4	3	4	3	3	4	4	3	2	4	4	3	3	4	4	3	4	4	4	4	4	4	3	3	4	3	5	2	4	4	4	4	3	4	3	4	5	5	3	4
396	Female	20-21	Year2	Low	4	3	4	4	3	4	4	3	4	3	4	4	5	4	4	3	5	5	4	3	3	4	4	3	4	4	4	3	5	3	3	5	4	4	3	4	3	4	5	3	4	5	3	4	4
397	Female	18-19	Year2	Low	4	4	4	4	4	3	4	4	5	4	5	4	4	4	4	4	3	4	3	3	3	5	4	3	3	5	3	4	5	4	3	3	4	4	4	5	4	3	4	3	4	3	4	4	5
398	Female	20-21	Year2	Low	3	4	3	3	4	4	5	4	3	5	4	3	4	4	3	4	4	5	4	4	3	4	3	4	4	3	3	4	3	3	4	3	4	4	3	4	4	4	4	3	4	4	4	3	4
399	Female	18-19	Year2	Intermediate	5	5	3	4	5	4	4	4	3	5	3	4	4	4	4	4	4	4	3	4	4	5	3	3	4	4	4	3	4	5	2	4	5	4	3	4	4	4	3	3	4	4	5	3	3
400	Male	20-21	Year2	Intermediate	4	4	4	3	4	4	3	4	3	4	4	3	5	4	4	5	5	4	4	3	4	3	4	3	3	3	4	4	5	3	3	4	4	3	3	4	4	4	5	5	4	4	4	4	4
401	Female	20-21	Year3	Low	4	3	4	3	3	3	4	4	4	5	3	4	4	5	3	3	5	4	5	5	4	4	3	3	3	4	5	3	5	4	3	4	3	3	4	4	4	3	3	4	3	3	4	4	4
402	Female	18-19	Year3	High	3	4	3	3	5	5	3	4	5	4	3	4	3	5	3	4	3	4	4	4	4	4	4	4	4	3	5	4	4	3	4	3	4	3	4	4	4	4	4	4	3	3	3	4	4
403	Male	18-19	Year3	Low	2	4	4	3	4	3	4	3	4	4	4	4	3	4	4	4	2	3	4	3	2	4	2	3	3	3	4	4	4	4	2	4	4	4	4	4	5	4	3	3	5	4	4	4	4
404	Male	18-19	Year3	Intermediate	4	5	3	3	4	4	4	3	4	4	4	4	4	4	4	4	5	4	3	5	4	5	3	4	4	3	3	5	5	3	4	4	4	5	3	4	5	4	4	4	4	3	4	4	4
405	Female	18-19	Year3	Intermediate	4	5	4	3	3	4	4	4	5	4	4	3	4	5	5	5	5	4	4	3	3	3	5	3	3	3	3	4	4	4	3	4	4	4	4	5	5	3	5	3	5	4	4	4	4
406	Female	22	Year3	High	4	3	4	5	4	3	4	4	5	4	3	5	4	3	4	3	4	4	3	3	3	4	4	3	5	4	4	3	3	4	5	3	4	4	4	4	4	4	4	4	5	4	3	3	4
407	Female	18-19	Year3	Intermediate	4	3	4	4	4	4	4	4	4	3	4	5	4	4	4	5	3	4	4	4	4	4	4	5	3	3	3	4	4	4	3	4	4	4	4	3	4	4	3	5	4	4	4	4	3
408	Female	22	Year3	High	4	3	4	4	3	3	4	4	2	4	3	4	4	5	4	4	4	3	4	3	3	4	5	3	5	4	3	4	4	4	4	3	4	4	3	5	3	3	4	4	4	3	4	4	4
409	Female	18-19	Year3	Intermediate	3	4	4	4	5	5	3	4	3	4	5	3	4	4	4	3	4	4	4	4	3	3	2	4	3	4	5	3	3	3	4	4	3	4	3	4	4	3	3	4	4	4	3	5	4
410	Female	20-21	Year3	High	4	4	4	4	5	4	3	3	4	4	3	4	4	4	3	5	4	3	4	4	2	5	3	3	4	5	4	4	4	3	4	4	3	5	4	5	4	3	4	4	3	3	5	4	4
411	Male	20-21	Year3	Low	4	4	4	4	4	3	4	5	4	3	3	4	4	3	3	3	4	2	4	4	4	3	3	3	5	4	3	5	3	5	4	4	5	5	3	5	5	4	4	4	3	4	4	4	3
412	Female	20-21	Year3	High	3	4	3	3	3	4	3	4	4	4	4	5	5	4	4	3	4	4	4	4	3	5	4	5	3	4	4	4	3	5	3	5	5	4	3	4	4	4	4	3	4	5	4	4	4
413	Female	20-21	Year3	Intermediate	4	4	4	5	4	4	4	4	5	5	3	4	3	3	4	3	3	4	4	4	4	5	4	4	4	5	3	3	4	4	4	4	5	4	4	4	4	4	4	5	4	4	4	4	4
414	Male	20-21	Year3	High	3	4	3	5	4	3	3	3	5	5	5	3	4	4	4	4	4	4	3	4	3	5	3	4	5	3	3	4	3	3	4	4	3	5	4	4	3	4	4	3	5	4	4	3	3
415	Male	18-19	Year3	Intermediate	4	3	4	3	4	3	4	4	4	5	3	4	5	3	5	3	4	5	3	5	4	3	4	3	4	3	3	3	4	5	3	4	3	4	5	3	4	3	3	4	4	4	4	4	5
416	Male	22	Year3	Intermediate	4	5	4	3	4	4	5	3	5	4	3	5	3	3	4	4	4	3	4	4	4	3	3	4	4	4	5	4	2	3	4	4	3	4	4	5	4	5	4	4	5	3	4	4	3
417	Male	22	Year3	Intermediate	3	3	4	4	4	3	3	4	4	4	3	5	4	3	5	4	4	3	4	4	5	5	5	5	4	3	4	4	3	4	5	4	4	3	4	3	4	4	4	3	4	5	4	5	4
418	Female	22	Year3	Intermediate	5	4	4	3	5	5	3	4	4	4	4	5	5	5	3	3	4	4	3	3	4	2	3	5	4	5	2	4	3	5	4	4	2	4	3	4	4	4	3	4	5	3	5	4	3
419	Female	18-19	Year3	Low	3	5	4	4	4	3	4	4	4	5	3	4	5	4	3	4	4	4	4	4	3	3	4	4	3	5	5	4	4	3	4	4	3	5	4	4	4	4	3	4	4	4	5	4	4
420	Female	20-21	Year3	Low	3	4	4	3	3	4	4	4	4	3	3	4	4	4	3	4	4	3	4	3	3	3	3	3	5	5	4	4	5	4	4	3	5	3	3	4	4	4	5	4	4	4	3	4	3
421	Female	22	Year3	Low	4	4	4	5	5	4	4	3	5	3	5	2	3	4	4	3	1	4	4	3	4	4	4	4	2	4	3	4	4	4	3	3	4	4	4	4	4	4	5	4	4	3	4	4	3
422	Female	18-19	Year3	Low	5	4	3	5	5	3	4	3	3	5	4	4	4	3	4	5	3	3	5	4	3	5	3	4	3	4	4	3	4	4	3	4	3	3	4	5	4	4	4	4	4	4	5	5	4
423	Female	18-19	Year3	High	3	4	3	4	5	4	4	4	4	4	4	4	5	3	4	3	4	3	3	3	2	4	4	3	5	3	4	3	4	3	4	4	3	5	3	4	3	4	4	5	5	4	4	4	4
424	Male	20-21	Year3	Low	4	5	3	4	3	4	4	5	4	3	5	4	3	3	4	2	3	3	4	4	5	3	4	3	4	4	4	5	3	3	4	4	4	5	5	4	3	4	2	4	4	5	4	4	5
425	Female	20-21	Year3	High	4	2	4	5	4	4	4	4	4	3	4	4	3	3	3	3	3	3	3	4	4	4	4	4	3	3	5	3	4	4	5	4	4	4	5	4	4	3	4	5	4	4	4	3	4
426	Male	22	Year3	Intermediate	4	5	4	3	3	5	3	4	5	3	3	3	4	4	4	3	3	4	4	2	4	4	4	4	4	2	3	4	3	3	4	4	3	4	5	5	3	3	4	5	4	4	3	3	5
427	Male	18-19	Year3	Low	4	3	3	3	4	4	4	4	4	3	3	4	4	3	4	4	4	3	4	3	3	4	4	3	3	3	4	4	4	4	3	4	4	4	4	4	5	3	4	5	5	4	4	4	4
428	Female	22	Year3	Intermediate	4	4	3	4	4	4	4	5	3	5	4	4	4	5	3	4	4	5	3	3	4	4	3	4	3	3	3	4	4	4	3	4	3	5	4	5	4	5	5	4	4	3	4	3	4
429	Male	18-19	Year3	Intermediate	3	4	4	4	5	4	3	3	4	4	4	4	4	4	3	4	4	5	3	3	3	2	4	4	4	5	3	3	3	4	5	3	3	3	5	4	4	4	4	3	5	4	4	5	3
430	Female	18-19	Year3	Intermediate	4	4	4	4	3	3	5	4	4	4	4	4	3	4	3	4	3	4	4	4	4	3	4	4	4	5	4	3	4	3	4	3	4	4	4	5	5	4	4	5	4	4	4	3	4
431	Male	18-19	Year3	Intermediate	3	3	4	3	3	3	3	3	3	4	3	4	3	4	5	4	4	3	5	4	3	5	4	3	3	3	4	3	4	5	4	3	4	4	3	4	5	3	4	4	4	4	5	4	4
432	Female	22	Year3	Intermediate	2	4	3	3	4	4	4	2	4	4	4	4	4	5	4	4	4	5	5	3	5	4	4	4	4	5	4	4	5	5	3	4	3	5	4	4	3	4	4	3	4	3	5	4	4
433	Male	20-21	Year3	Low	4	5	4	4	3	4	4	4	3	4	3	4	4	4	4	4	4	5	5	5	3	4	4	4	4	4	4	3	3	4	5	4	4	2	4	5	4	3	4	4	5	4	5	4	4
434	Female	20-21	Year3	High	4	3	3	4	4	2	3	4	3	5	4	4	4	4	3	4	3	4	3	2	5	5	3	4	4	3	3	4	4	3	4	2	4	3	3	5	4	3	3	3	4	4	4	5	3
435	Female	20-21	Year3	High	2	4	4	5	3	4	3	4	3	3	5	4	3	4	5	4	4	5	3	5	4	3	4	4	4	3	3	5	3	4	3	5	4	3	4	5	3	4	4	4	5	4	4	3	4
436	Female	22	Year3	Intermediate	3	3	3	3	4	4	4	4	4	4	3	4	3	4	5	4	4	3	4	3	3	4	4	3	4	3	4	3	4	4	3	4	3	4	5	4	3	4	3	4	4	3	4	4	4
437	Female	20-21	Year3	Low	4	4	4	4	3	4	4	5	4	4	3	4	4	4	3	4	2	2	5	4	4	4	4	5	5	4	5	3	4	4	4	4	2	2	3	4	4	4	5	4	3	4	4	3	3
438	Female	22	Year3	Intermediate	5	4	3	5	4	5	4	4	3	4	3	5	4	4	3	4	5	3	4	3	4	3	4	4	4	3	5	5	4	4	4	5	4	2	3	4	4	4	4	4	4	4	4	3	4
439	Male	20-21	Year3	Low	4	3	4	5	5	4	3	4	4	4	4	5	5	4	4	4	4	5	3	5	5	4	3	3	4	4	4	4	3	4	4	2	3	5	4	4	4	3	4	4	3	4	3	3	3
440	Male	20-21	Year3	Low	3	4	4	4	4	5	4	3	3	4	4	4	5	4	4	4	4	3	3	3	4	4	4	3	4	3	4	3	4	4	4	3	3	4	4	3	3	4	4	4	4	3	4	4	4
441	Male	20-21	Year3	Intermediate	4	5	4	4	3	4	4	4	4	4	4	1	3	4	3	5	4	4	4	4	3	3	4	4	4	4	4	5	3	4	4	3	3	4	3	4	3	4	3	4	4	5	3	4	5
442	Female	18-19	Year3	Intermediate	5	4	5	4	4	4	4	4	3	3	4	5	3	4	4	3	3	4	4	4	4	4	4	4	4	4	4	4	3	3	3	4	4	4	4	4	4	3	5	4	4	4	3	4	4
443	Male	20-21	Year3	High	3	4	4	4	4	5	4	4	4	4	4	4	4	3	3	3	3	3	4	3	5	3	2	3	3	3	3	4	3	4	4	4	5	4	5	3	4	4	5	4	4	3	4	4	4
444	Female	20-21	Year3	Intermediate	3	3	3	4	4	5	4	5	4	4	3	3	4	4	4	3	4	3	4	3	5	4	4	5	3	4	4	4	4	3	3	5	3	4	4	4	2	4	4	4	5	4	4	4	3
445	Female	18-19	Year3	Intermediate	4	3	4	4	3	3	5	5	4	4	4	4	4	4	5	4	5	4	2	4	4	5	4	4	4	5	3	3	4	5	4	4	3	3	4	4	4	4	5	4	4	4	4	4	5
446	Male	22	Year3	Intermediate	3	4	3	2	4	4	4	4	5	4	3	4	3	5	3	2	4	3	4	3	4	4	3	4	5	3	4	3	2	5	4	4	4	4	3	4	3	4	4	4	4	5	4	4	5
447	Male	20-21	Year3	Intermediate	4	5	4	4	2	4	5	2	4	5	3	4	3	3	4	4	4	3	4	3	4	3	4	4	3	3	5	4	5	4	3	4	4	4	3	4	5	4	4	4	5	4	5	4	3
448	Female	20-21	Year3	Intermediate	5	4	3	4	3	4	4	4	4	5	3	3	4	4	3	4	3	4	3	4	5	4	3	4	4	4	4	3	4	5	4	3	2	3	4	3	5	4	5	3	5	4	4	3	4
449	Male	22	Year3	High	4	4	4	4	4	4	3	5	4	5	4	3	4	4	3	5	4	4	3	4	3	3	3	4	4	4	3	4	3	4	4	2	4	5	4	3	4	3	4	4	3	4	3	4	5
450	Female	20-21	Year3	Low	4	4	3	5	4	3	4	4	4	5	4	4	4	5	4	3	5	4	2	4	3	4	3	4	4	3	4	4	4	4	3	3	5	3	3	5	3	4	4	4	4	4	4	4	5
451	Female	18-19	Year3	High	4	3	4	3	4	4	4	5	4	4	4	4	4	4	4	4	4	3	5	4	4	4	3	4	5	5	3	4	5	3	4	4	2	4	3	4	4	3	4	4	3	3	3	4	3
452	Female	22	Year3	Intermediate	3	4	3	4	3	3	3	5	4	4	2	4	4	3	4	5	4	3	3	3	3	5	4	4	4	4	4	5	4	4	4	4	3	4	5	4	4	3	4	5	3	3	3	4	3
453	Female	20-21	Year3	Intermediate	4	4	5	5	3	5	4	4	3	4	3	3	4	4	3	5	4	4	4	3	3	5	3	3	3	4	4	3	5	4	4	4	2	5	3	4	5	4	3	4	4	4	3	4	4
454	Female	18-19	Year3	Intermediate	4	4	4	3	4	4	4	3	4	4	4	3	4	4	4	3	4	5	4	5	3	4	3	4	3	4	4	4	3	3	4	4	4	3	4	4	5	3	3	3	4	3	3	3	3
455	Male	18-19	Year3	Intermediate	4	4	5	3	4	4	4	2	4	4	5	4	4	3	4	4	4	4	5	3	5	4	5	3	5	5	5	4	3	3	4	5	4	3	3	3	4	3	4	4	5	5	4	4	4
456	Male	22	Year3	High	5	4	4	4	3	4	4	4	3	4	3	4	4	3	4	4	5	4	4	3	4	3	4	5	4	3	5	4	3	4	5	3	4	3	4	4	4	5	3	4	4	5	3	4	5
457	Female	20-21	Year3	High	4	4	4	4	4	5	4	3	3	4	4	5	4	5	3	4	5	4	3	3	4	4	2	3	3	4	4	3	5	4	4	4	5	4	4	5	4	3	3	4	4	4	3	4	3
458	Female	20-21	Year3	Intermediate	3	4	4	4	4	2	4	4	5	3	5	3	4	4	4	4	4	4	4	4	3	4	3	4	3	5	4	3	4	3	3	4	4	5	2	3	4	5	3	3	4	3	5	4	4
459	Male	22	Year3	Intermediate	4	5	4	3	4	4	4	3	4	5	3	4	4	4	3	5	4	4	5	4	3	4	4	4	4	4	4	4	5	3	4	4	5	5	3	3	4	4	4	4	3	4	4	4	4
460	Male	20-21	Year3	Intermediate	5	4	3	4	4	4	3	4	4	4	4	3	4	4	5	2	3	4	4	4	3	5	4	4	4	3	3	3	3	5	3	5	5	2	4	4	3	4	4	3	4	4	3	4	5
461	Female	18-19	Year3	High	4	4	4	3	5	4	5	4	3	5	3	3	4	4	5	3	3	3	3	4	5	4	3	4	4	3	5	4	3	3	5	5	3	4	3	5	5	4	5	4	5	5	4	3	4
462	Male	18-19	Year3	Low	3	3	4	4	3	5	4	4	3	3	4	4	5	4	4	4	4	3	3	4	4	4	5	4	5	4	4	2	4	4	5	4	4	2	4	4	4	5	4	3	4	3	3	4	5
463	Female	18-19	Year3	Intermediate	4	4	4	4	3	3	4	3	5	3	3	4	4	4	5	4	4	4	3	4	4	4	4	5	4	5	4	3	5	4	4	4	3	4	3	3	4	3	4	4	5	4	3	4	4
464	Male	20-21	Year3	Intermediate	3	4	3	4	4	4	3	5	4	4	3	4	3	4	4	5	3	5	4	5	4	4	4	3	4	4	4	3	4	4	4	4	4	5	4	4	4	4	4	4	4	4	4	4	4
465	Female	18-19	Year3	Intermediate	5	3	4	3	3	4	5	3	3	5	5	4	4	4	4	5	4	3	4	4	3	3	5	4	3	4	5	5	4	3	4	4	4	4	3	3	3	4	2	4	3	4	4	4	4
466	Male	20-21	Year3	Low	5	5	5	4	4	5	3	3	4	4	4	4	3	4	5	4	2	4	3	4	5	5	4	3	3	3	4	4	4	4	4	4	4	4	4	4	4	4	4	4	4	4	3	5	4
467	Female	20-21	Year3	Intermediate	4	5	5	4	3	3	4	4	3	4	5	4	3	3	4	5	5	5	3	4	3	5	4	4	4	3	3	3	4	4	3	3	5	4	3	4	3	5	3	4	4	4	4	5	3
468	Male	22	Year3	High	5	3	4	5	4	3	4	4	5	3	4	5	4	3	4	3	5	4	4	4	5	4	5	4	3	3	4	4	3	4	4	4	4	3	5	3	4	4	4	4	4	4	5	4	4
469	Male	18-19	Year3	Low	4	3	4	4	5	5	4	4	5	3	3	4	4	3	3	4	4	3	4	3	4	4	5	4	5	5	4	4	4	4	3	3	3	4	3	3	3	5	3	4	4	4	4	4	4
470	Female	22	Year3	Low	4	4	4	5	4	4	4	5	4	4	4	4	3	5	4	5	4	4	4	4	3	4	3	5	5	4	5	4	4	4	4	4	3	4	4	4	3	4	4	4	3	3	3	3	4
471	Male	18-19	Year3	High	4	3	3	4	4	3	5	4	3	3	5	4	4	4	4	5	4	3	5	4	3	4	4	3	4	4	4	3	4	5	4	4	4	4	3	4	5	4	4	3	5	5	3	3	5
472	Female	22	Year3	Low	3	4	3	5	3	4	4	4	2	4	3	3	3	3	4	4	3	3	5	3	3	4	3	4	3	4	5	4	4	5	5	3	3	4	5	3	3	4	3	3	4	5	4	4	4
473	Male	18-19	Year3	High	3	3	5	4	3	4	3	3	3	4	4	3	4	4	4	4	4	4	3	4	5	3	4	3	3	5	3	4	5	3	4	3	4	3	4	4	4	4	4	4	3	4	4	3	4
474	Female	20-21	Year3	Intermediate	4	4	4	4	2	4	4	4	3	3	4	3	4	3	4	3	4	3	4	5	4	4	4	4	5	3	3	3	3	2	4	2	5	3	4	4	5	4	4	4	4	4	4	5	4
475	Male	22	Year3	Low	4	3	4	5	3	3	4	4	4	5	5	4	4	5	3	4	4	3	3	5	2	4	3	3	3	4	5	4	3	4	4	3	4	2	5	4	5	4	4	4	3	5	3	4	4
476	Female	18-19	Year3	High	4	4	4	4	4	2	5	4	4	5	4	4	4	3	4	3	4	4	4	4	4	4	4	3	5	3	3	4	3	4	5	4	4	5	4	4	3	4	4	3	3	3	3	4	4
477	Male	18-19	Year3	Intermediate	3	4	5	4	4	4	3	3	3	3	3	4	4	4	4	3	3	4	4	5	3	4	4	4	4	5	3	4	4	4	4	4	4	3	4	4	3	4	4	3	4	4	5	4	4
478	Female	20-21	Year3	Intermediate	4	3	5	3	4	3	5	5	4	3	4	3	3	4	4	3	4	4	4	3	3	4	3	5	4	3	4	4	3	4	4	5	3	4	4	4	3	4	4	4	4	4	4	3	4
479	Male	20-21	Year3	Intermediate	5	4	5	3	4	3	4	3	4	2	5	5	5	4	4	3	4	5	4	4	5	4	4	4	3	3	3	4	4	4	4	4	3	5	4	3	4	4	4	4	3	5	4	4	4
480	Female	20-21	Year3	Intermediate	3	4	4	4	3	2	4	3	4	3	3	3	4	4	5	4	4	4	4	5	4	4	4	5	4	4	5	4	5	5	3	4	4	3	3	5	5	3	4	4	4	4	4	4	3
481	Female	20-21	Year3	Low	4	4	4	4	4	4	4	4	3	4	3	4	3	3	4	4	4	4	4	3	4	3	4	4	4	4	4	4	2	5	4	3	4	3	4	3	3	4	4	4	4	5	4	4	4
482	Female	20-21	Year3	Intermediate	5	4	3	3	4	4	3	3	4	4	4	4	4	4	4	3	5	3	3	3	3	4	4	3	4	4	4	3	4	3	2	4	4	4	4	4	5	4	3	4	5	3	4	4	4
483	Male	18-19	Year3	High	4	5	5	4	3	4	4	3	3	4	4	4	4	3	4	4	4	4	3	5	3	3	5	5	3	4	4	3	3	3	3	3	4	4	4	4	4	5	4	4	3	3	3	4	3
484	Female	18-19	Year3	Intermediate	4	3	3	5	4	5	4	3	4	3	4	5	4	4	4	4	4	3	3	3	3	4	4	4	4	3	5	5	4	4	4	3	5	5	4	3	4	3	4	4	3	4	3	4	3
485	Male	18-19	Year3	Intermediate	3	5	4	4	4	4	4	4	4	4	4	3	4	5	3	3	5	4	3	3	5	4	4	3	4	5	4	2	3	4	5	3	5	5	3	4	3	4	4	3	4	4	4	3	4
486	Female	22	Year3	Intermediate	4	4	3	3	4	5	4	4	3	3	3	3	3	3	4	4	4	4	5	5	3	4	3	4	4	4	3	4	5	4	4	3	4	4	5	4	4	4	4	4	5	4	4	5	3
487	Male	20-21	Year3	Intermediate	4	3	3	4	4	3	3	5	3	4	3	4	4	3	4	5	4	4	3	5	4	5	4	4	3	5	3	3	4	4	3	3	5	5	3	3	4	3	3	5	4	4	4	4	4
488	Female	20-21	Year3	Low	4	3	3	3	5	4	3	3	4	4	5	4	4	3	4	4	4	3	3	4	2	4	4	2	3	3	4	3	4	4	3	4	3	4	4	2	4	3	4	5	5	4	4	5	3
489	Male	20-21	Year3	High	5	4	3	4	4	3	4	3	2	3	3	5	4	4	4	4	5	2	4	4	3	4	5	4	4	4	3	4	4	5	4	4	3	4	4	3	4	4	5	4	4	3	3	4	4
490	Male	22	Year3	Intermediate	5	4	4	4	4	4	4	3	4	3	3	4	4	4	4	3	4	4	4	3	4	4	4	5	3	4	4	3	3	4	3	3	4	4	3	5	3	5	4	4	4	4	5	4	4
491	Female	18-19	Year3	Low	4	4	4	4	3	4	3	4	4	4	5	4	5	4	3	4	5	4	4	4	4	5	3	5	5	5	3	3	3	3	4	4	3	3	5	5	3	3	5	4	3	3	4	4	5
492	Male	20-21	Year3	Low	4	5	4	3	4	4	4	4	4	4	4	3	3	4	4	4	4	4	5	5	5	4	3	4	4	5	4	3	4	4	4	5	4	5	4	4	4	4	4	4	4	4	4	3	4
493	Male	20-21	Year3	Low	4	3	3	4	4	4	4	4	3	4	4	3	3	3	3	3	3	5	4	4	5	3	4	4	3	4	4	4	3	4	4	4	4	4	5	4	5	4	4	4	4	5	5	5	5
494	Female	20-21	Year3	Intermediate	4	4	4	3	4	4	3	3	3	4	4	3	3	4	3	3	4	4	3	5	4	4	3	4	3	3	4	3	5	4	4	4	5	4	4	4	4	4	3	4	4	5	5	5	4
495	Male	18-19	Year3	Intermediate	4	3	5	2	3	4	3	3	3	4	5	4	4	4	3	3	4	3	3	3	4	5	4	4	4	5	3	5	4	4	4	3	4	4	4	3	4	4	4	4	4	4	4	3	4
496	Male	22	Year3	High	4	4	4	5	4	5	3	3	3	3	4	5	3	3	4	5	4	2	3	4	4	4	4	5	3	4	4	5	4	5	4	3	3	3	3	3	4	5	4	4	4	4	4	4	4
497	Male	22	Year3	Intermediate	4	4	3	5	5	4	4	2	3	4	5	5	4	4	4	5	2	4	4	4	5	4	4	4	4	3	3	2	5	3	3	4	4	3	3	4	4	4	4	3	4	4	5	4	5
498	Female	20-21	Year3	Low	5	4	4	4	4	3	3	4	4	4	3	4	4	4	3	3	4	4	4	3	5	5	4	4	4	4	4	4	3	4	3	5	3	4	3	4	3	5	4	4	5	4	4	4	4
499	Male	20-21	Year3	Intermediate	3	2	5	4	4	4	3	4	3	5	4	4	3	4	4	4	3	3	3	4	4	4	3	3	4	3	4	4	4	5	2	5	4	3	4	4	3	4	4	4	4	4	4	5	3
500	Female	22	Year3	Intermediate	5	4	4	3	4	3	5	3	4	4	3	4	3	4	3	3	3	4	4	4	4	4	4	4	3	4	4	4	4	3	4	4	4	4	4	3	4	4	3	4	4	3	4	4	3
501	Male	20-21	Year3	Low	5	4	4	5	4	5	5	5	4	5	5	4	4	4	4	5	3	4	3	4	5	3	3	3	4	3	3	3	4	4	5	4	4	4	3	4	5	3	4	4	4	4	3	5	5
502	Male	18-19	Year3	Low	4	4	4	5	4	4	3	5	3	4	4	5	4	4	4	4	3	3	5	5	4	4	4	4	5	4	5	4	4	3	4	5	4	3	4	3	4	4	4	4	4	4	4	4	4
503	Male	20-21	Year3	Low	3	5	3	4	3	3	4	4	4	3	3	4	4	4	4	4	4	4	3	4	5	4	4	4	5	4	4	3	3	4	4	4	3	3	3	4	4	4	4	3	4	4	4	4	4
504	Female	20-21	Year3	Intermediate	3	3	4	4	4	4	4	3	4	4	4	4	3	4	5	3	3	5	4	5	2	4	4	4	2	4	4	3	4	3	3	2	3	3	4	4	4	4	4	4	4	5	3	4	5
505	Male	20-21	Year3	Intermediate	5	4	4	4	3	4	5	3	3	4	4	2	4	4	3	4	4	4	4	4	4	4	4	4	5	4	5	3	5	4	4	3	3	4	5	3	3	4	4	3	3	4	4	5	3
506	Male	20-21	Year3	Intermediate	4	5	4	3	3	4	3	3	4	3	4	4	5	3	4	4	5	3	4	5	3	4	4	5	4	4	5	4	4	4	4	4	3	4	4	5	5	4	4	3	4	4	5	4	4
507	Female	22	Year3	High	3	3	3	4	4	3	5	3	3	4	3	4	4	5	4	4	4	4	4	5	5	4	4	4	4	4	5	3	4	3	5	3	4	3	4	3	4	4	4	5	4	4	4	4	4
508	Male	22	Year3	High	4	4	3	4	4	5	4	3	4	4	4	3	3	3	4	4	4	2	4	4	5	4	5	3	3	4	4	4	3	4	3	3	4	4	2	4	4	3	5	4	4	3	4	3	4
509	Female	20-21	Year3	Intermediate	4	4	4	4	3	3	3	3	4	5	4	3	4	3	4	4	5	4	5	3	4	4	4	3	3	4	4	3	4	4	3	3	4	4	4	4	3	3	4	3	3	4	4	4	4
510	Female	18-19	Year3	High	4	4	5	4	4	4	4	4	3	3	4	4	3	4	4	3	5	4	4	3	5	3	4	3	4	4	4	4	4	4	3	4	4	3	4	3	4	4	4	5	5	4	4	4	3
511	Male	22	Year3	Low	4	4	3	4	4	4	5	3	4	5	4	3	4	4	4	4	5	5	5	4	5	4	4	4	3	3	3	3	3	3	3	4	3	5	3	4	4	4	4	4	4	4	4	4	3
512	Female	22	Year3	Low	4	4	4	4	3	3	5	4	4	3	3	4	4	5	3	4	3	4	3	4	4	4	4	3	3	3	4	4	3	4	3	4	4	3	3	3	3	5	4	4	5	5	4	4	5
513	Male	18-19	Year3	Intermediate	4	3	3	4	3	4	3	4	4	3	4	4	3	3	4	3	3	4	4	4	5	3	4	4	3	4	4	4	2	4	4	4	4	4	5	2	3	4	4	4	5	4	3	5	3
514	Female	22	Year3	Low	3	4	3	3	4	3	4	3	2	5	4	4	4	4	4	3	4	3	4	4	4	2	4	5	4	4	4	5	3	3	3	4	4	4	3	3	3	4	5	4	4	3	3	3	4
515	Female	22	Year3	Intermediate	5	3	4	3	4	4	4	5	3	4	3	3	4	3	4	3	4	4	4	4	4	5	4	3	4	4	4	2	4	3	1	3	5	3	4	4	3	3	3	4	3	3	4	3	4
516	Male	20-21	Year3	High	4	3	3	3	4	3	4	3	4	5	3	4	4	4	4	3	4	3	5	3	4	4	4	4	4	4	3	3	5	4	4	3	4	4	4	4	4	5	4	4	5	3	4	3	4
517	Female	20-21	Year3	Low	5	4	3	4	4	4	3	3	4	4	4	5	4	4	3	5	5	4	4	4	4	4	4	4	4	3	4	4	4	5	3	4	4	3	4	4	4	4	5	4	3	5	4	4	3
518	Female	20-21	Year3	Low	5	3	3	3	3	5	3	4	3	5	2	4	3	5	3	4	4	4	3	5	4	3	4	4	3	3	3	4	4	5	4	3	3	4	4	4	4	4	3	4	4	4	4	3	3
519	Female	18-19	Year3	Intermediate	4	4	4	5	4	4	3	3	4	4	3	3	4	4	4	3	4	4	4	4	5	4	4	5	4	4	5	3	4	3	4	3	3	4	5	3	5	4	4	5	4	4	4	4	4
520	Female	18-19	Year3	High	4	4	4	5	4	4	4	4	4	4	3	5	3	4	3	4	3	3	3	4	4	4	3	3	3	4	4	3	4	3	5	4	4	5	4	4	4	3	3	4	4	4	4	4	4
521	Female	22	Year3	Intermediate	4	3	2	4	4	4	3	2	4	4	4	4	3	4	5	3	5	4	4	4	3	3	4	4	4	4	4	4	4	3	4	3	4	3	4	3	3	3	4	4	4	5	4	4	4
522	Male	18-19	Year3	Intermediate	4	3	3	2	3	3	4	5	3	5	3	5	4	4	3	4	4	4	4	4	4	5	4	4	3	4	4	4	5	3	3	3	4	3	4	3	4	5	4	4	4	4	3	4	4
523	Female	18-19	Year3	Low	3	5	3	4	5	5	4	4	3	3	4	4	4	3	4	4	4	4	3	3	3	4	4	3	4	3	4	4	4	4	3	4	5	5	4	4	5	3	4	3	4	4	3	5	3
524	Male	20-21	Year3	Low	4	3	4	4	3	3	4	3	4	3	5	2	4	4	5	4	4	4	4	3	4	3	4	3	4	3	3	4	5	4	5	4	3	4	4	4	4	3	4	4	5	4	3	5	3
525	Female	20-21	Year3	High	3	4	2	3	5	3	5	3	4	4	4	3	5	3	4	3	3	4	3	4	4	4	4	4	3	5	4	4	4	3	3	5	2	4	4	4	5	4	4	4	4	4	4	4	5
526	Male	22	Year3	High	5	4	4	4	4	4	4	5	5	3	4	4	4	5	4	3	3	4	4	3	5	2	5	4	5	3	4	4	4	5	4	4	4	3	2	4	4	3	4	4	4	4	3	4	5
527	Male	18-19	Year3	Low	4	4	4	5	4	3	3	3	4	4	4	4	4	4	3	3	3	4	4	5	4	4	4	3	4	3	3	4	2	4	4	4	4	4	3	4	3	4	4	4	4	4	4	5	4
528	Female	18-19	Year3	High	4	4	5	4	4	3	5	3	3	3	4	3	4	5	3	4	3	4	5	3	5	4	3	5	4	4	3	4	4	4	4	2	3	4	3	4	4	5	4	5	4	4	4	3	4
529	Female	20-21	Year3	Intermediate	4	3	4	3	5	3	3	2	4	4	4	3	4	4	4	5	3	4	4	3	3	4	5	4	3	4	4	2	4	3	4	3	4	3	4	3	4	4	4	3	4	4	5	4	4
530	Female	20-21	Year3	High	4	5	4	3	4	4	4	4	5	4	4	3	4	4	5	3	5	3	4	5	4	5	3	4	3	4	3	5	3	2	4	3	4	3	4	4	5	3	4	4	4	4	4	4	4
531	Male	18-19	Year3	Intermediate	4	5	4	4	3	4	5	4	4	4	4	4	4	4	4	3	4	4	4	3	5	3	3	3	4	3	5	2	3	3	4	3	3	3	4	4	5	4	5	3	4	3	4	4	5
532	Female	20-21	Year3	Intermediate	4	4	3	4	5	4	4	4	3	5	3	5	4	4	3	4	4	5	4	4	3	3	3	4	4	4	5	3	4	3	4	4	4	5	4	4	4	4	3	4	5	4	5	3	4
533	Male	18-19	Year3	Intermediate	4	4	4	4	4	4	3	3	4	3	5	4	3	4	2	4	5	3	3	4	5	3	4	4	3	4	4	4	4	4	4	4	5	4	3	4	4	4	3	4	4	4	3	4	4
534	Male	18-19	Year3	Intermediate	3	3	4	4	4	4	3	3	4	5	4	5	3	4	3	4	5	4	3	3	3	4	3	2	5	4	4	4	3	2	4	4	3	5	5	4	4	4	3	4	4	4	5	3	4
535	Male	20-21	Year3	Low	4	3	4	4	5	4	5	4	3	4	4	4	3	3	4	4	3	3	4	5	3	4	3	3	4	4	4	2	3	5	3	4	4	4	5	4	4	4	3	4	4	4	4	5	4
536	Female	20-21	Year3	Low	5	4	5	5	3	4	4	4	4	3	5	4	5	3	5	3	3	4	3	4	4	4	4	4	3	4	4	4	4	4	4	3	2	3	5	5	3	4	4	4	4	4	4	3	4
537	Female	22	Year3	Intermediate	3	4	3	4	4	4	4	3	4	5	4	5	4	5	4	5	3	4	4	5	4	4	4	5	4	4	5	4	4	5	3	5	3	5	4	3	4	4	4	4	4	4	3	4	4
538	Male	20-21	Year3	Intermediate	3	5	5	4	3	5	4	5	5	4	3	4	4	4	4	5	3	4	4	3	4	3	3	4	5	4	3	4	4	3	3	5	4	4	4	4	4	4	5	5	4	4	4	3	3
539	Male	20-21	Year3	Low	4	4	4	4	4	4	4	4	4	3	4	4	3	4	4	4	4	3	4	4	3	5	4	5	3	4	3	3	5	4	4	4	5	4	5	4	3	4	3	3	3	4	4	3	4
540	Female	20-21	Year3	Intermediate	4	3	4	4	4	4	4	5	4	3	4	4	4	5	3	2	3	4	3	4	4	5	3	4	4	4	5	4	4	4	4	4	3	3	3	4	5	3	4	4	4	4	4	3	3
541	Male	18-19	Year3	High	4	4	4	5	3	3	4	4	5	4	4	5	4	4	5	3	4	4	4	4	3	4	3	4	4	5	3	3	4	4	4	4	4	4	3	4	4	4	4	4	4	4	4	4	4
542	Female	20-21	Year3	Low	4	3	4	3	3	3	4	2	3	4	3	4	4	5	4	4	4	3	3	3	3	3	4	5	4	3	3	3	3	4	4	4	4	4	3	4	3	4	4	4	5	4	4	5	4
543	Male	18-19	Year3	Intermediate	4	4	3	4	5	4	4	4	4	4	3	3	3	4	3	3	3	2	3	4	3	5	3	5	5	4	4	3	3	4	3	3	4	4	4	5	5	4	4	4	4	5	3	4	3
544	Female	22	Year3	Intermediate	5	4	4	4	4	4	4	4	3	4	4	4	4	3	3	5	2	3	3	3	3	3	4	5	3	4	3	3	5	5	4	3	3	3	3	3	4	4	3	5	4	4	4	5	4
545	Male	18-19	Year3	High	4	5	3	4	4	4	4	3	5	4	3	4	4	5	3	4	3	4	4	4	4	4	3	3	5	3	5	4	5	3	4	4	4	4	4	5	3	5	5	2	3	4	4	4	3
546	Female	20-21	Year3	Low	4	5	4	3	4	4	5	4	4	4	4	4	3	4	4	3	3	5	5	2	5	3	5	4	5	4	4	4	3	4	3	5	3	4	3	5	5	4	5	4	3	4	4	4	4
547	Male	18-19	Year3	Intermediate	4	4	4	4	4	5	4	4	5	3	5	3	4	4	4	4	4	4	4	3	3	3	4	4	4	4	3	4	4	2	4	3	4	4	4	3	4	3	4	3	3	4	5	4	4
548	Female	22	Year3	High	5	4	3	4	5	4	3	2	4	4	4	5	3	4	4	3	3	3	3	4	4	4	4	4	4	3	5	4	4	4	4	2	4	4	3	4	5	3	3	3	5	4	4	3	4
549	Female	20-21	Year3	High	4	4	4	4	4	4	3	5	3	2	3	3	4	4	4	4	3	3	3	3	3	3	5	4	3	4	5	4	4	5	4	3	4	4	3	4	3	5	4	5	4	4	4	3	4
550	Male	20-21	Year3	Intermediate	3	4	5	4	4	4	3	3	5	4	3	4	4	4	5	3	3	4	4	3	4	4	3	4	4	4	4	4	3	3	4	4	4	3	5	4	3	4	4	4	4	5	4	4	4
551	Male	18-19	Year3	Intermediate	5	4	4	5	5	3	4	4	5	3	4	3	3	2	3	5	4	4	3	5	3	4	4	4	4	3	3	3	4	4	3	3	4	3	5	3	4	3	5	4	3	4	5	4	4
552	Female	20-21	Year3	Intermediate	4	5	4	3	3	4	5	4	4	4	3	5	3	3	5	5	3	3	4	4	3	3	2	5	4	4	5	3	4	4	5	3	4	4	4	3	4	3	3	4	3	3	3	4	5
553	Male	18-19	Year3	High	2	4	3	5	5	4	3	5	3	5	4	4	4	4	3	3	3	4	4	4	4	4	5	4	5	4	4	4	4	4	3	4	4	4	4	4	3	4	4	4	4	4	3	4	4
554	Female	22	Year3	Intermediate	4	4	4	3	3	4	4	4	4	3	4	3	4	4	4	2	3	3	4	4	3	4	4	3	4	3	4	4	4	4	3	4	4	4	3	4	3	4	3	3	5	4	4	5	5
555	Male	18-19	Year3	Low	4	4	4	4	5	4	3	4	4	4	5	4	4	4	4	4	4	3	4	5	4	4	4	4	5	3	5	3	4	3	4	4	4	3	3	4	4	4	4	5	4	5	5	4	4
556	Female	18-19	Year3	High	4	4	5	4	4	4	4	3	3	4	4	4	4	3	4	3	3	4	4	3	2	4	3	5	5	4	4	4	4	3	4	3	3	4	4	4	3	3	4	3	3	5	4	4	3
557	Female	18-19	Year3	Intermediate	4	4	4	3	4	5	3	4	5	5	3	4	5	5	4	4	4	4	4	5	4	4	4	3	4	4	3	5	4	4	4	4	4	5	3	4	4	4	5	4	5	4	4	4	4
558	Female	20-21	Year3	Intermediate	4	3	4	4	3	5	4	3	4	4	5	4	4	5	4	4	4	4	5	4	4	4	5	4	3	4	4	4	4	4	3	5	3	4	4	4	4	5	3	4	3	4	4	3	3
559	Female	20-21	Year3	Low	4	3	4	5	4	4	4	4	2	3	4	3	3	4	3	5	4	4	4	3	4	4	4	4	3	3	4	4	4	3	5	3	4	4	4	4	4	3	5	4	4	4	4	4	4
560	Female	18-19	Year3	Intermediate	4	3	5	2	3	4	4	3	4	4	3	4	4	4	3	4	3	3	4	4	3	5	3	4	3	4	2	4	4	4	4	5	3	3	3	4	3	4	3	4	5	4	4	4	3
561	Female	20-21	Year3	Intermediate	4	4	3	4	3	4	4	5	4	4	4	3	5	4	5	4	4	4	4	4	5	3	4	4	4	3	4	2	3	5	4	3	4	3	5	4	5	5	3	3	4	5	5	4	5
562	Male	20-21	Year3	Intermediate	4	4	4	2	4	4	3	4	4	3	5	3	4	5	4	2	4	4	3	3	3	3	2	3	3	3	5	4	4	3	4	4	4	3	4	4	4	4	3	4	4	5	3	4	3
563	Male	20-21	Year3	Low	4	4	4	3	4	4	5	4	4	4	4	5	3	4	4	4	4	4	3	3	3	5	4	2	4	4	3	4	3	3	4	4	3	5	4	4	4	4	4	4	3	5	3	3	4
564	Male	20-21	Year3	Intermediate	4	5	4	5	4	4	4	4	4	4	4	5	4	5	3	4	5	3	3	4	5	4	4	3	3	5	5	3	3	4	5	3	4	4	3	3	4	4	3	4	3	5	5	5	4
565	Female	20-21	Year3	High	3	4	4	3	4	4	4	3	5	5	5	4	3	3	4	4	4	3	3	4	3	2	4	3	4	4	5	3	4	3	4	3	4	3	4	4	3	4	3	5	3	4	4	3	4
566	Female	20-21	Year3	Low	5	4	4	3	3	2	4	3	4	3	3	5	4	3	4	3	4	4	4	2	4	4	4	5	4	4	4	4	3	3	3	4	4	4	4	3	4	4	4	3	4	4	3	4	4
567	Female	18-19	Year3	High	4	3	4	4	3	4	4	4	4	4	3	4	3	3	4	3	4	5	3	4	4	4	4	4	5	3	3	4	3	4	4	4	3	4	4	4	3	3	4	4	4	4	3	5	4
568	Female	18-19	Year3	Intermediate	4	4	4	5	5	4	4	4	4	4	3	4	4	4	2	3	4	4	5	3	4	2	4	3	5	3	4	3	4	3	4	5	3	4	5	4	3	3	4	5	4	4	3	4	4
569	Male	22	Year3	High	4	4	5	3	3	5	4	5	4	4	4	4	3	4	4	2	3	3	4	3	4	5	3	3	5	4	5	5	3	3	4	5	4	5	4	4	5	4	4	4	4	4	4	5	3
570	Male	22	Year3	Intermediate	5	4	4	3	5	4	3	4	3	5	4	4	4	4	3	3	3	3	4	4	4	3	4	4	5	3	5	3	3	4	4	3	4	4	3	3	5	4	5	5	3	3	4	4	3
571	Female	20-21	Year3	Intermediate	4	4	4	5	4	3	4	3	4	4	5	4	4	4	4	3	4	3	4	4	4	4	5	5	4	4	4	3	4	3	4	3	4	3	4	5	5	4	4	5	4	4	4	4	4
572	Male	18-19	Year3	Intermediate	4	4	4	5	4	4	4	3	4	4	4	5	4	5	3	4	4	5	3	5	4	4	3	4	3	4	3	4	4	3	4	3	4	3	3	3	4	4	4	4	5	3	4	3	3
573	Male	20-21	Year3	High	4	3	3	4	5	3	4	4	5	4	4	4	4	3	3	3	4	3	4	4	5	3	4	4	3	3	4	4	5	4	4	3	2	4	4	4	4	4	4	4	4	4	4	4	5
574	Female	20-21	Year3	Intermediate	4	4	4	3	5	4	5	2	5	4	4	4	3	3	4	3	5	4	4	4	3	3	5	3	2	3	4	4	3	2	3	5	5	3	3	4	4	4	3	3	4	4	5	3	4
575	Male	18-19	Year3	Intermediate	4	4	4	5	4	4	3	5	3	4	4	4	4	4	3	3	3	4	3	4	4	3	5	4	3	4	3	4	4	3	5	4	4	4	4	4	4	4	4	5	4	4	5	5	3
576	Female	18-19	Year3	Intermediate	3	4	5	5	4	4	4	4	4	4	3	4	4	4	4	2	3	4	3	4	4	4	3	5	4	4	4	3	4	3	3	3	4	3	3	4	3	3	4	5	5	4	4	3	4
577	Male	20-21	Year3	High	3	4	3	4	4	3	4	5	3	3	5	3	3	3	3	5	4	4	4	3	4	4	4	5	3	4	5	5	3	3	5	4	4	4	4	4	3	3	4	5	3	5	4	4	4
578	Female	20-21	Year3	Intermediate	3	4	4	3	4	4	3	3	4	3	4	3	5	4	3	3	3	3	4	3	5	3	4	3	4	3	3	4	4	4	4	5	5	4	4	5	4	3	4	4	5	3	4	3	4
579	Female	18-19	Year3	High	4	4	3	4	4	3	4	5	4	4	4	4	4	3	4	3	5	3	3	4	4	3	3	4	4	5	4	4	4	4	3	5	3	4	4	4	3	4	3	5	4	4	4	4	3
580	Female	18-19	Year3	Intermediate	5	3	4	4	4	4	4	5	3	5	4	4	4	4	3	3	4	5	3	4	2	5	4	4	4	3	5	4	3	5	4	4	5	3	3	3	3	3	3	4	4	3	4	5	3
581	Female	18-19	Year3	High	4	4	4	4	4	4	3	3	4	2	4	4	5	4	4	4	4	4	3	4	4	5	4	3	3	4	3	4	4	4	4	2	4	4	3	4	4	3	4	3	5	4	4	4	4
582	Male	20-21	Year3	Low	4	4	4	5	5	4	4	4	2	4	4	4	5	3	4	4	3	4	3	5	3	5	4	2	4	3	5	3	4	3	4	4	4	3	3	4	4	5	4	5	3	4	4	5	4
583	Female	18-19	Year3	Intermediate	4	4	4	4	4	4	3	4	3	4	3	5	4	4	3	3	3	4	4	4	3	4	3	4	3	4	3	3	3	3	3	4	4	3	2	4	4	4	4	5	4	4	5	3	4
584	Female	18-19	Year3	Low	5	4	4	3	4	4	3	3	4	3	4	3	4	3	3	3	4	4	4	4	3	4	3	3	4	4	4	5	3	5	4	4	3	4	5	4	4	4	4	3	4	4	4	3	4
585	Female	22	Year3	Intermediate	3	3	4	5	3	5	4	4	4	4	4	3	3	5	4	5	4	5	3	3	3	3	4	3	5	3	4	5	4	4	4	4	4	4	4	4	4	5	4	3	3	4	4	3	4
586	Male	18-19	Year3	Intermediate	4	5	3	4	2	4	5	4	4	4	3	4	4	4	5	4	3	4	3	4	3	4	5	4	4	4	4	3	5	4	3	4	4	4	3	4	4	3	4	4	4	4	5	4	4
587	Female	20-21	Year3	Intermediate	4	4	4	4	4	4	4	3	3	4	5	4	4	4	3	4	4	4	4	4	2	3	4	4	5	5	3	4	3	4	3	3	5	5	5	4	3	4	4	4	4	4	4	3	4
588	Male	18-19	Year3	Intermediate	4	3	2	5	4	3	2	5	3	2	4	4	4	4	4	3	5	3	4	4	4	3	4	4	5	5	4	3	5	4	4	3	4	4	3	3	4	4	4	3	4	4	4	3	4
589	Female	18-19	Year3	Intermediate	4	4	4	3	4	3	3	3	4	5	4	4	4	3	3	2	5	3	4	3	5	4	4	3	3	4	4	3	3	3	3	4	3	4	4	4	4	4	4	4	4	4	4	4	3
590	Male	18-19	Year3	Intermediate	4	4	3	4	4	4	4	3	4	3	5	5	4	3	4	4	4	3	5	3	4	3	4	4	3	4	4	4	4	4	4	4	5	3	3	4	4	4	4	4	4	4	4	3	4
591	Male	20-21	Year3	Low	2	4	5	4	4	5	4	4	4	4	4	3	4	4	4	4	3	5	4	4	4	5	5	3	4	5	3	5	4	4	4	3	5	4	2	4	5	3	5	4	4	4	4	3	3
592	Female	22	Year3	Intermediate	4	4	4	3	5	4	4	4	5	4	4	3	3	4	3	5	4	2	3	4	4	4	4	4	5	5	4	4	4	3	4	4	4	3	3	5	3	4	4	3	4	4	3	4	4
593	Male	22	Year3	Low	3	4	4	4	4	4	4	3	4	3	4	4	3	4	4	2	5	3	4	3	3	4	4	2	3	3	4	4	4	3	4	4	3	4	3	4	5	4	4	4	4	4	4	4	4
594	Female	20-21	Year3	Low	3	3	5	5	3	4	5	4	3	4	3	4	4	4	3	3	5	2	4	5	4	4	3	4	4	3	4	4	4	5	5	5	4	3	4	4	4	3	4	4	4	4	3	4	4
595	Female	20-21	Year3	Intermediate	4	5	3	3	4	4	4	4	4	4	4	5	4	4	4	3	4	3	3	3	4	3	4	4	5	4	5	4	5	4	3	4	4	4	4	4	5	5	4	3	4	3	3	3	4
596	Female	18-19	Year3	Intermediate	5	4	5	4	4	4	4	4	3	3	4	4	4	5	4	4	5	3	3	4	3	5	4	3	3	3	3	4	4	5	3	3	4	4	4	3	5	4	4	4	3	4	5	4	3
597	Male	18-19	Year3	Intermediate	4	4	4	4	4	3	3	4	4	5	3	4	3	3	3	4	4	5	4	3	5	4	4	4	3	4	2	5	3	3	3	4	4	4	2	3	5	4	4	3	3	5	3	4	4
598	Male	22	Year3	Intermediate	4	4	4	4	4	5	3	4	5	3	5	3	4	4	3	4	4	4	4	5	3	4	3	5	4	4	3	2	4	3	5	5	5	4	5	4	4	3	4	4	4	4	3	4	4
599	Female	18-19	Year3	Intermediate	5	3	5	4	3	3	3	4	4	3	3	3	4	3	4	4	3	3	3	3	4	3	3	2	4	4	4	4	5	3	5	4	3	3	4	3	3	4	5	4	3	3	3	5	5
600	Female	18-19	Year3	High	5	4	3	3	4	4	4	5	5	4	3	3	4	4	5	3	4	4	3	5	4	3	4	4	3	4	3	3	4	3	3	3	4	4	4	3	3	5	4	3	4	4	5	4	5
[truncated: 53 more columns]
